# Supplementary material for: Long-term trends in human body size track regional variation in subsistence transitions and growth acceleration linked to dairying
Source: PubMed Central journal article supplement — Proc Natl Acad Sci U S A. 2023 Jan 17;120(4):e2209482119. doi: 10.1073/pnas.2209482119 (PMC9942808; doi:10.1073/pnas.2209482119), 2023-01-17
Supplement: pnas.2209482119.sapp.pdf [file pnas.2209482119.sapp.pdf]

## Supporting Information

### ***Long-term trends in human body size track regional variation in subsistence transitions and suggest growth acceleration linked to dairying***

Jay T. Stock<sup>a</sup>, Emma Pomeroy<sup>b</sup>, Christopher B. Ruff<sup>c</sup>, Marielle Brown<sup>b</sup>, Matthew A. Gasperetti<sup>b</sup>, Fa-Jun Li<sup>d</sup>, Lisa Maher<sup>e</sup>, Caroline Malone<sup>f</sup>, Veena Mushrif<sup>g</sup>, Eóin Parkinson<sup>f</sup>, Michael Rivera<sup>h</sup>, Yun Ysi Siew<sup>b</sup>, Sofija Stefanovic<sup>i</sup>, Simon Stoddart<sup>b</sup>, Gunita Zariņa<sup>j</sup>, Jonathan C.K. Wells<sup>k</sup>

<sup>a</sup> Department of Anthropology, Social Science Centre, Western University London, Ontario, Canada, N6A 3K7

<sup>b</sup> Department of Archaeology, University of Cambridge, Downing Street, Cambridge, United Kingdom, CB2 3DZ

<sup>c</sup> Center for Functional Anatomy and Evolution, Johns Hopkins University School of Medicine, 1830 East Monument Street, Baltimore, Maryland 21205 USA

<sup>d</sup> Department of Anthropology, School of Sociology and Anthropology, Sun Yat-Sen University, Martin Hall, No.135 of Xingangxi Road, Guangzhou, 510275, China,

<sup>e</sup> Department of Anthropology, University of California, Berkeley, 232 Anthropology and Art Practice Building, Berkeley, CA, USA 94720-3710

<sup>f</sup> Archaeology, Geography and Palaeoecology, Queen's University Belfast, Belfast, BT7 1NN, United Kingdom

<sup>g</sup> Department of Archaeology, Deccan College Post-Graduate and Research Institute, Pune, 411006, India

<sup>h</sup> Department of History, School of Humanities, The University of Hong Kong, Hong Kong

<sup>i</sup> Department of Archaeology, Laboratory for Bioarchaeology, University of Belgrade, 11000 Belgrade, Serbia

<sup>j</sup> Institute of Latvian History, University of Latvia, Kalpaka Bulvaris 4, Riga 1050, Latvia

<sup>k</sup> Population, Policy and Practice Research and Teaching Department, UCL Great Ormond Street Institute of Child Health, 30 Guilford Street, London WC1N 1EH, UK.

## Materials and Methods

Our study included skeletal metric data from seven regions, including Southern, Central, and Northern Europe, the Levant, the Nile valley, South Asia, and China. The combined dataset was derived from previously published studies but also included a significant amount of new data. The European dataset was primarily drawn from previous studies (1, 2) but was supplemented by unpublished data collected by our team. Similarly, some of our data from the Nile Valley (3) and South Asia (4) has previously published but these data have been supplemented with additional measurements for the current study. Our data from the Levant and China have not been previously published. The data from China are generally patterned into Northern and Southern groups, which we have pooled for the purposes of this study, however future analyses should include a broader spatial range, and investigate phenotypic correlates of lactase persistence among steppe herders into Central Asia (5). We have compiled additional datasets from other regions that were not used in this study. Our datasets representing sub-Saharan Africa and the Sahel are, at present, insufficient to provide the spatial-temporal resolution to test for the phenotypic consequences of selection for lactase persistence in these regions. Given the strong evidence for convergent evolution of lactase persistence within Africa (6–11) the further testing for phenotypic correlates of lactase persistence within Africa is essential. At present, the available datasets for skeletal variation within Africa are seriously under-represented by historic biases in archaeological exploration, recovery, and curation. We excluded data from the Americas in the current study due to the geographic focus of this special issue. All unpublished measurements were taken by authors of the current study. While we have not been able to directly test for inter-observer error in skeletal measurements among our team, we note that the osteometric measurements used are defined using well accepted standards and reflect maximum length and breadth measures which previous studies have illustrated to be subject to negligible inter-observer error when data are collected by experienced researchers (12, 13). Similarly, sex was determined, wherever possible, by dimorphic features of the pelvis which have been shown to be over 95% accurate relative to aDNA sex determination (14). Where sex was unknown or ambiguous, individuals were classified as being of 'indeterminate' sex, and were excluded from any sex-based comparisons. Future analyses should expand our datasets to allow for greater spatio-temporal resolution within specific subregions, and in particular, those where the chronology of cultural and dietary change is well resolved.

**Figure S1a.** Location of European Archaeological sites from which skeletal phenotypic data are derived, grouped by Southern Europe (purple), Central Europe (blue), and Northern Europe (green)

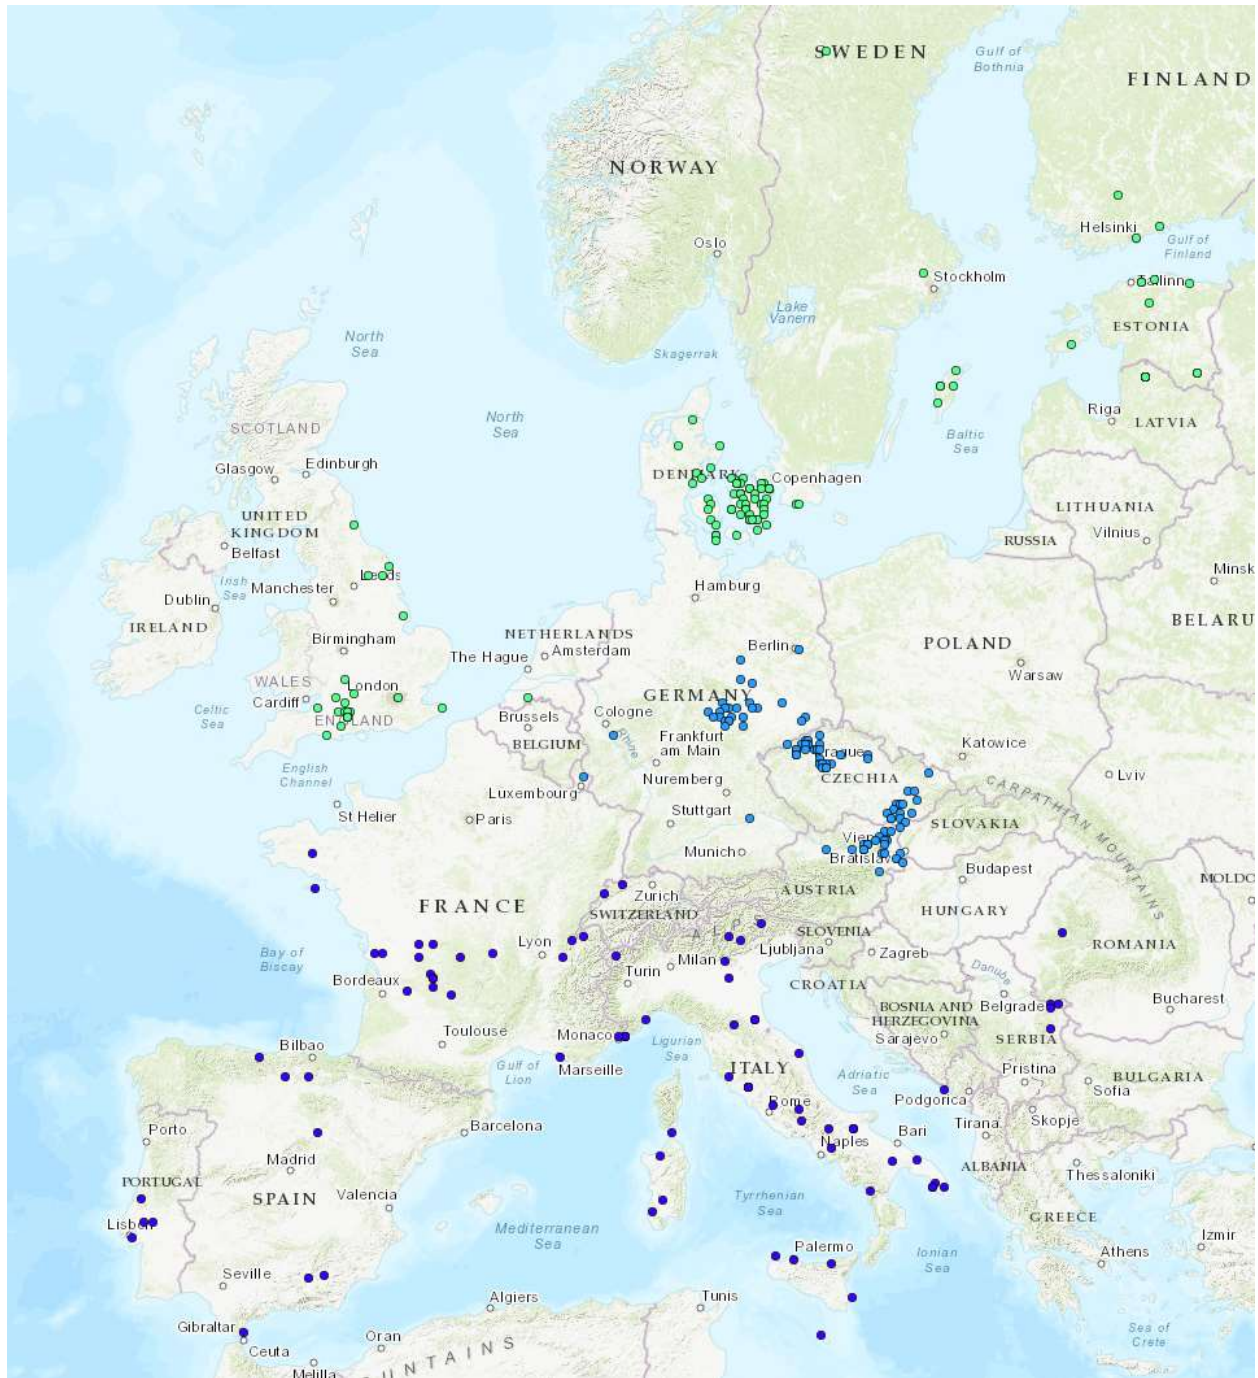

Figure S1b. Location of Archaeological sites in the Nile Valley (green) and Levant (red)

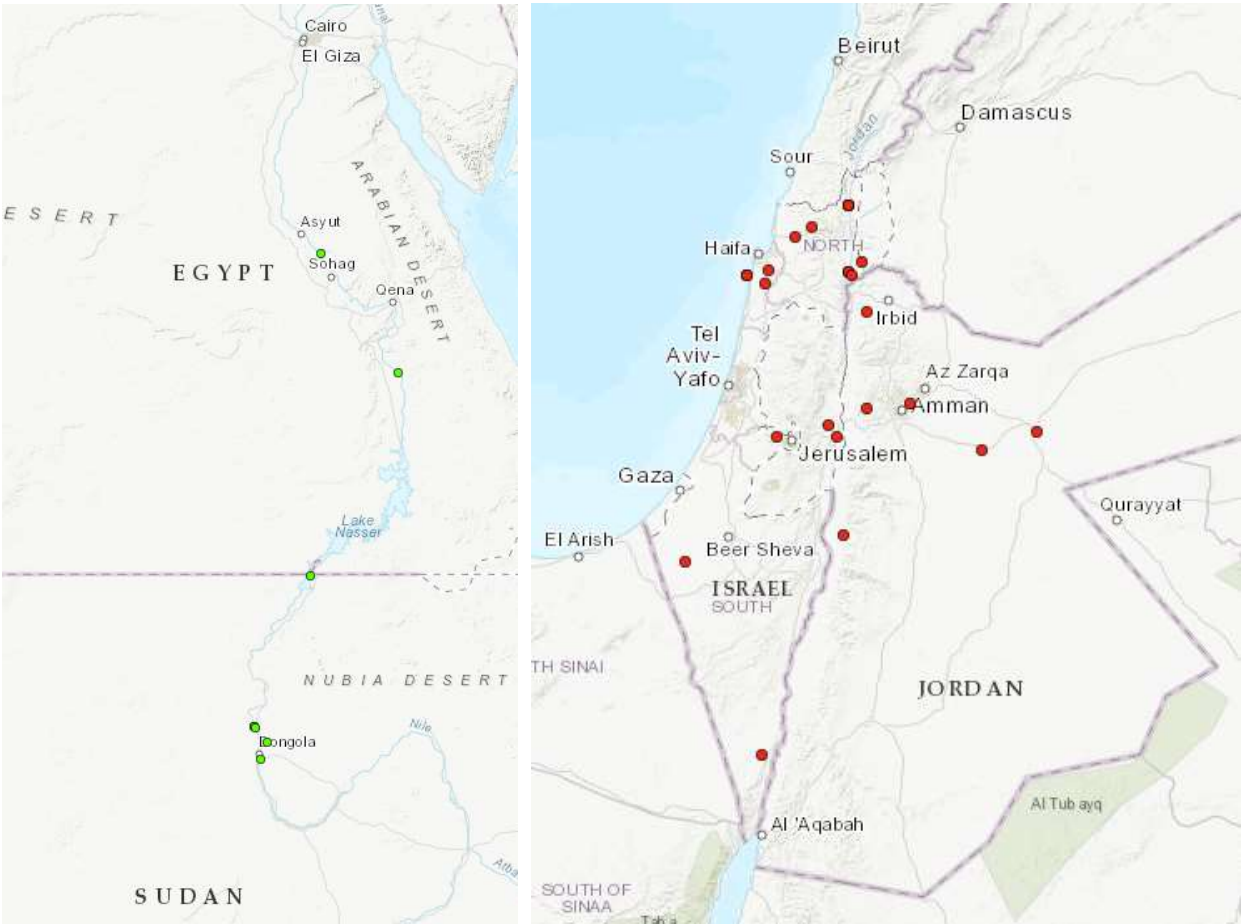

Figure S1c. Location of Archaeological sites in South Asia

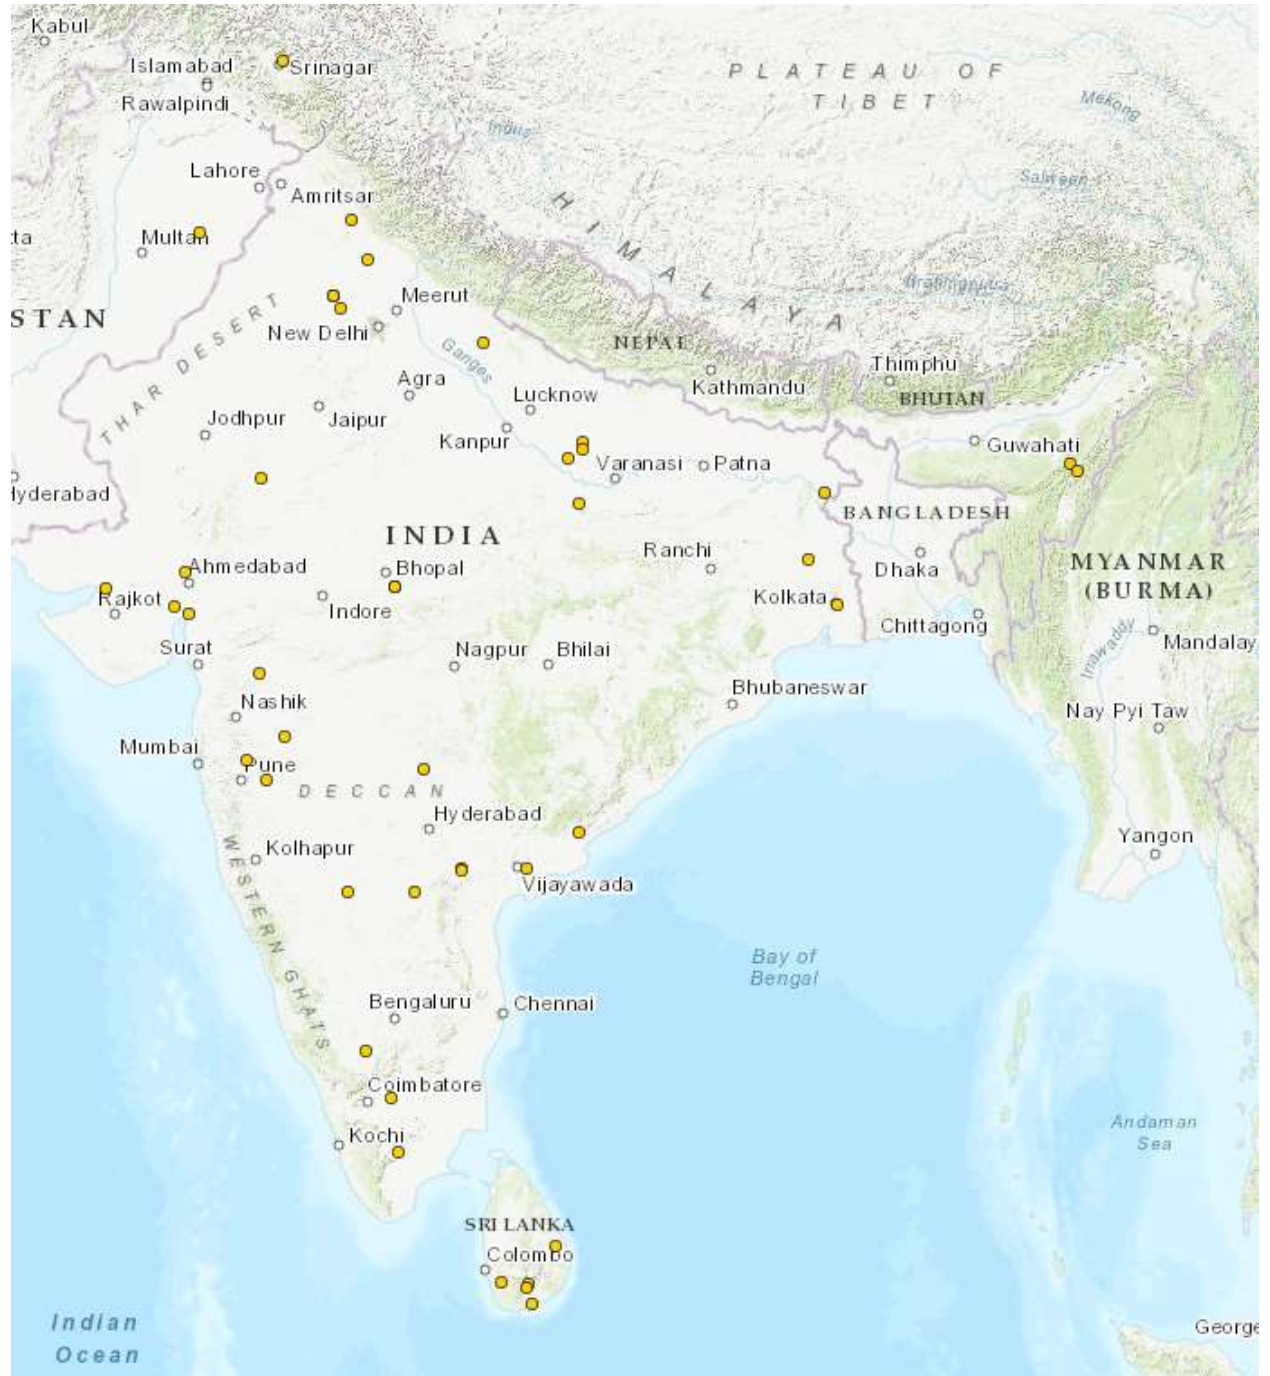

Figure S1d. Location of Archaeological sites in China

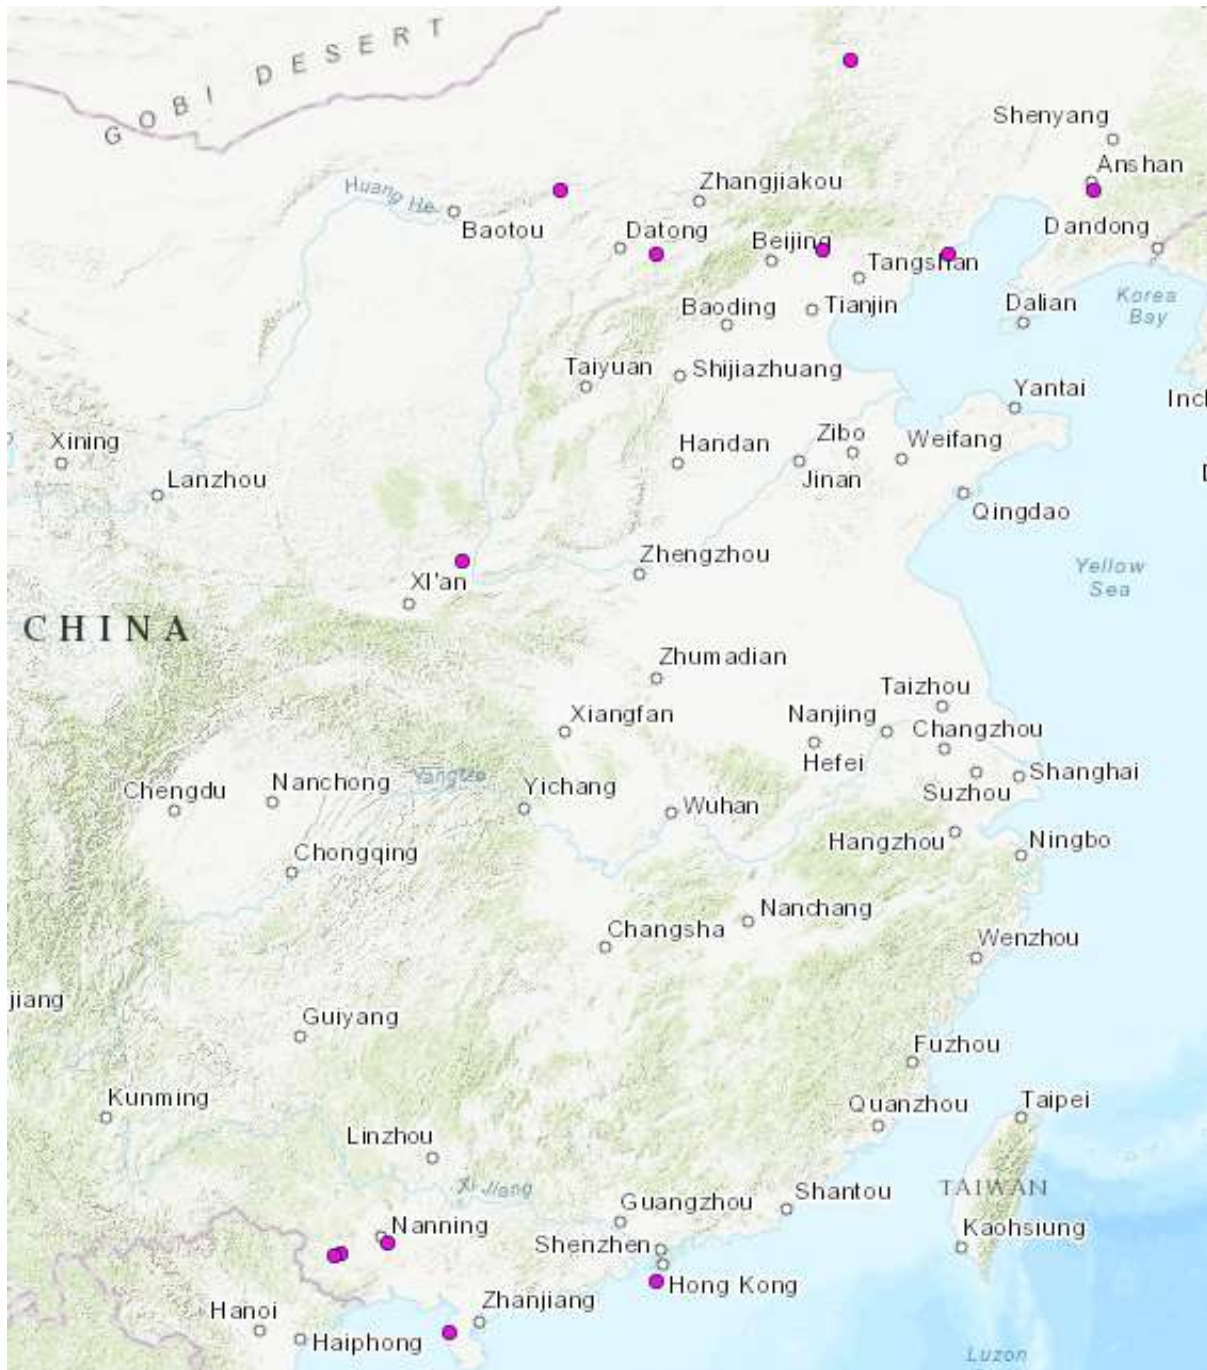

**Table S1.** Archaeological sites from which skeletal material used in this study were derived

| Site                 | YearsBP | Region         | Latitude | Longitude |
|----------------------|---------|----------------|----------|-----------|
| A303                 | 4250    | Britain        | 51.20    | -1.80     |
| Abhaipur             | 2800    | South Asia     | 28.30    | 79.75     |
| Abu Ghosh (TAU)      | 9985    | West Asia      | 31.80    | 35.10     |
| 'Ain Ghazal          | 9850    | West Asia      | 31.99    | 35.98     |
| Ain Mallaha          | 12375   | West Asia      | 33.09    | 35.58     |
| Ain Mallaha          | 12375   | West Asia      | 33.09    | 35.58     |
| Ajvide               | 4700    | Scand./Finland | 57.30    | 18.20     |
| Amesbury             | 4350    | Britain        | 51.20    | -1.80     |
| Ardu (Kose)          | 4650    | Baltics        | 59.10    | 25.35     |
| Arene Candide        | 10500   | Italy          | 44.20    | 8.30      |
| Asnæs                | 1900    | Scand./Finland | 55.80    | 11.50     |
| Åstrup Ås            | 4800    | Scand./Finland | 54.90    | 12.10     |
| Ayn Qasiyah          | 23000   | West Asia      | 31.83    | 36.82     |
| Bab edh-Dhra'        | 4675    | West Asia      | 31.25    | 35.54     |
| Bad Durrenberg       | 4550    | N.-Cen. Europe | 51.30    | 12.10     |
| Bad Sulza            | 7150    | N.-Cen. Europe | 51.10    | 11.60     |
| Badari               | 6500    | Nile           | 26.90    | 31.50     |
| Baghai Khor          | 4500    | South Asia     | 24.80    | 82.10     |
| Bagor Historic       | 550     | South Asia     | 25.36    | 74.37     |
| Balupur              | 450     | South Asia     | 25.06    | 88.06     |
| Barma Grande         | 29576   | Italy          | 43.80    | 7.60      |
| Battlesbury Bowl     | 2100    | Britain        | 51.20    | -2.10     |
| Bedinge              | 4550    | Scand./Finland | 55.40    | 13.40     |
| Bellan Bandi Palassa | 11000   | South Asia     | 6.52     | 80.81     |
| Bernhardsthal        | 4000    | N.-Cen. Europe | 48.70    | 16.90     |
| Bhagwanpura          | 3200    | South Asia     | 30.07    | 76.95     |
| Bhimbetka Mesolithic | 6250    | South Asia     | 22.94    | 77.61     |
| Bichon               | 13504   | N.-Cen. Europe | 47.20    | 6.90      |
| Bilzingsleben        | 4550    | N.-Cen. Europe | 51.30    | 11.10     |
| Birsmatten           | 6290    | N.-Cen. Europe | 47.40    | 7.50      |
| Bischleben           | 7300    | N.-Cen. Europe | 50.90    | 11.00     |
| Blackgate            | 925     | Britain        | 55.00    | -1.60     |
| Bloksbjerg           | 6232    | Scand./Finland | 55.50    | 12.40     |
| Bodal Mose           | 5790    | Scand./Finland | 55.60    | 11.50     |
| Bøgebjerg            | 1900    | Scand./Finland | 55.80    | 11.40     |
| Bonifacio            | 10000   | France         | 41.40    | 9.20      |
| Borre                | 3975    | Scand./Finland | 55.00    | 12.40     |
| Boscombe, LC         | 4250    | Britain        | 51.20    | -1.70     |
| Bottendorf           | 6850    | N.-Cen. Europe | 51.30    | 11.40     |
| Brandysek            | 4250    | N.-Cen. Europe | 50.20    | 14.20     |

| Site                    | YearsBP | Region          | Latitude | Longitude |
|-------------------------|---------|-----------------|----------|-----------|
| Braunsdorf              | 4550    | N.-Cen. Europe  | 51.00    | 13.60     |
| Bray's Cave             | 3750    | Southern Europe | 36.13    | -5.33     |
| Brezno (BBC)            | 4250    | N.-Cen. Europe  | 50.40    | 13.40     |
| Broskov                 | 1700    | Scand./Finland  | 55.10    | 12.00     |
| Brozany                 | 4600    | N.-Cen. Europe  | 50.50    | 14.20     |
| Bruchstedt              | 7000    | N.-Cen. Europe  | 51.20    | 10.80     |
| Brucknendorf            | 1300    | N.-Cen. Europe  | 48.00    | 16.80     |
| Bruniquel               | 18394   | France          | 45.70    | 2.00      |
| Burzahom                | 3900    | South Asia      | 34.17    | 74.87     |
| Bystrocice              | 3600    | N.-Cen. Europe  | 49.50    | 17.20     |
| Cachovice               | 4550    | N.-Cen. Europe  | 50.30    | 14.90     |
| Cap Blanc               | 13000   | France          | 46.00    | 1.10      |
| Castellon Alta, Granada | 3450    | Iberia          | 37.70    | -2.60     |
| Caviglione              | 30965   | Italy           | 43.80    | 7.60      |
| Chancelade              | 13000   | France          | 46.00    | 0.60      |
| Chandoli                | 3200    | South Asia      | 19.00    | 74.00     |
| Chinnamarur             | 3350    | South Asia      | 15.97    | 78.09     |
| Chongtang/Jianbian      | 5000    | South China     | 22.46    | 107.37    |
| Chrastany 1             | 3850    | N.-Cen. Europe  | 50.00    | 14.30     |
| Cliff's End             | 3050    | Britain         | 51.30    | 1.40      |
| Cockey Down             | 2150    | Britain         | 51.10    | -1.80     |
| Cockey Down             | 2250    | Britain         | 51.10    | -1.80     |
| Crichel Down            | 3950    | Britain         | 50.90    | -2.00     |
| Cro-Magnon              | 32285   | France          | 45.30    | 1.00      |
| Culoz                   | 8550    | France          | 46.10    | 5.80      |
| Cuzoul de Gramat        | 7720    | France          | 44.80    | 1.70      |
| Damdama                 | 8750    | South Asia      | 26.17    | 82.17     |
| Dingsishan              | 7500    | South China     | 22.73    | 108.48    |
| Døjringe                | 5600    | Scand./Finland  | 55.50    | 11.60     |
| Dolni Vestonice         | 4250    | N.-Cen. Europe  | 48.90    | 16.60     |
| Dolní Vestonice         | 31427   | N.-Cen. Europe  | 49.10    | 16.70     |
| Dragsholm               | 5928    | Scand./Finland  | 55.80    | 11.40     |
| Dresden Briesnitz       | 950     | N.-Cen. Europe  | 51.10    | 13.70     |
| Drosa                   | 4550    | N.-Cen. Europe  | 51.80    | 11.90     |
| Egebjerg                | 1700    | Scand./Finland  | 55.10    | 10.50     |
| Ein Gev                 | 13000   | West Asia       | 32.70    | 35.60     |
| El-Wad                  | 14050   | West Asia       | 32.66    | 35.02     |
| Endegårde               | 1700    | Scand./Finland  | 55.10    | 12.10     |
| Englerup                | 1700    | Scand./Finland  | 55.70    | 11.80     |
| Erfurt Nord             | 4550    | N.-Cen. Europe  | 51.00    | 11.00     |
| Eynan                   | 12375   | West Asia       | 33.09    | 35.58     |
| Fa Hien                 | 10390   | South Asia      | 6.65     | 80.22     |



| Site               | YearsBP | Region         | Latitude | Longitude |
|--------------------|---------|----------------|----------|-----------|
| Farmana            | 4300    | South Asia     | 29.04    | 76.31     |
| Fontenoce Recanati | 5450    | Italy          | 43.40    | 13.50     |
| Forlí-Celletta     | 5000    | Italy          | 44.22    | 12.01     |
| Franzhausen I (U)  | 3895    | N.-Cen. Europe | 48.30    | 15.70     |
| Fraugde            | 1700    | Scand./Finland | 55.40    | 10.50     |
| Frederiksberg      | 4550    | Scand./Finland | 55.70    | 12.50     |
| Fridtorp           | 4600    | Scand./Finland | 57.60    | 18.30     |
| Gammel Lundby      | 1700    | Scand./Finland | 55.10    | 11.90     |
| Gemeinlebarn F     | 3845    | N.-Cen. Europe | 48.30    | 15.80     |
| Gemeinlebarn-Mitte | 4600    | N.-Cen. Europe | 48.30    | 15.80     |
| Gjerrild           | 4550    | Scand./Finland | 56.50    | 10.80     |
| Gough's Cave       | 10224   | Britain        | 51.30    | -2.80     |
| Græsbjerg          | 1800    | Scand./Finland | 55.10    | 12.10     |
| Grose              | 3975    | Scand./Finland | 55.80    | 12.30     |
| Großfahner         | 4550    | N.-Cen. Europe | 51.10    | 10.80     |
| Großkayna          | 4550    | N.-Cen. Europe | 51.30    | 11.90     |
| Groszmugl          | 3960    | N.-Cen. Europe | 48.50    | 16.20     |
| Grotte des Enfants | 13034   | France         | 43.80    | 7.60      |
| Grydehøj           | 4800    | Scand./Finland | 54.80    | 11.40     |
| Hainburg           | 3800    | N.-Cen. Europe | 48.10    | 16.90     |
| Hajdučka Vodenica  | 7750    | Balkans        | 44.60    | 22.30     |
| Halbturn           | 1650    | N.-Cen. Europe | 47.90    | 17.00     |
| Hallebyga°rd       | 5547    | Scand./Finland | 55.60    | 11.30     |
| Harappa            | 4300    | South Asia     | 30.63    | 72.87     |
| Haunø-Lauenkjer    | 4800    | Scand./Finland | 56.50    | 9.40      |
| Hayonim            | 12505   | West Asia      | 32.92    | 35.22     |
| Hazleton North     | 5400    | Britain        | 51.90    | -1.90     |
| Hecun              | 4250    | South China    | 22.50    | 107.50    |
| Hellested          | 5025    | Scand./Finland | 55.30    | 12.30     |
| Helsinki           | 65      | Scand./Finland | 60.20    | 24.90     |
| Hierakonpolis      | 5500    | Nile           | 25.10    | 32.80     |
| Himlingøje         | 1700    | Scand./Finland | 55.40    | 12.20     |
| Hjortholm Mose     | 4800    | Scand./Finland | 54.80    | 10.70     |
| Hobersdorf         | 3960    | N.-Cen. Europe | 48.60    | 16.60     |
| Hoedic             | 7412    | France         | 47.30    | -2.90     |
| Holmegård          | 9042    | Scand./Finland | 55.30    | 11.70     |
| Holmstrup          | 5350    | Scand./Finland | 55.90    | 11.60     |
| Holubice IV        | 4250    | N.-Cen. Europe | 49.20    | 16.80     |
| Hulin-Pravcice 1   | 3600    | N.-Cen. Europe | 49.30    | 17.50     |
| Inamgaon           | 3050    | South Asia     | 18.58    | 74.50     |
| Ire                | 4581    | Scand./Finland | 57.90    | 18.80     |
| Jau Dignac         | 1350    | France         | 45.80    | -0.90     |

| Site                     | YearsBP | Region         | Latitude | Longitude |
|--------------------------|---------|----------------|----------|-----------|
| Jebel Sahaba             | 13000   | Nile           | 21.98    | 31.33     |
| Jena                     | 10      | N.-Cen. Europe | 50.90    | 11.60     |
| Jenisuv Ujezd            | 2200    | N.-Cen. Europe | 50.60    | 13.70     |
| Jericho                  | 3700    | West Asia      | 31.87    | 35.44     |
| Jiangjialiang            | 7789    | North China    | 40.00    | 114.00    |
| Jinggouzi                | 2350    | North China    | 43.00    | 118.00    |
| Jinonice                 | 2200    | N.-Cen. Europe | 50.00    | 14.40     |
| Jotsoma                  | 200     | South Asia     | 25.67    | 94.06     |
| Kaothe                   | 3900    | South Asia     | 21.00    | 74.33     |
| Kawa                     | 2000    | Nile           | 19.10    | 30.50     |
| Kbely                    | 4250    | N.-Cen. Europe | 50.10    | 14.60     |
| Kelderød                 | 5300    | Scand./Finland | 55.40    | 11.50     |
| Kerma                    | 3800    | Nile           | 19.60    | 30.40     |
| Kerma                    | 3575    | Nile           | 19.63    | 30.39     |
| Kharaneh IV              | 19000   | West Asia      | 31.72    | 36.45     |
| Knezeves (BBC)           | 4250    | N.-Cen. Europe | 50.10    | 14.30     |
| Kobylysy                 | 4550    | N.-Cen. Europe | 50.10    | 14.40     |
| Kodumanal                | 2000    | South Asia     | 11.11    | 77.51     |
| Koelbjerg                | 9000    | Scand./Finland | 55.90    | 10.20     |
| Kölljala (Püha)          | 6135    | Baltics        | 58.36    | 22.72     |
| Korsør Glaesverk         | 7079    | Scand./Finland | 55.30    | 11.20     |
| Korsør Nor               | 4800    | Scand./Finland | 55.30    | 11.20     |
| Kuclin                   | 4550    | N.-Cen. Europe | 50.50    | 13.80     |
| Kuntasi                  | 700     | South Asia     | 22.91    | 70.59     |
| Kuragala                 | 7060    | South Asia     | 6.63     | 80.87     |
| La Rochette              | 28563   | France         | 45.00    | 1.10      |
| Lamadong                 | 1650    | North China    | 40.00    | 120.00    |
| Landlystvej              | 1900    | Scand./Finland | 55.70    | 12.50     |
| Langebjerget             | 4800    | Scand./Finland | 55.10    | 11.80     |
| Langhnaj                 | 4300    | South Asia     | 23.27    | 72.53     |
| Lanhill                  | 4950    | Britain        | 51.50    | -2.20     |
| Laxenburger Str./Voesend | 1300    | N.-Cen. Europe | 48.10    | 16.40     |
| Le Peyrat                | 14051   | France         | 45.20    | 1.10      |
| Le Peyrat                | 14051   | France         | 45.20    | 1.10      |
| Le Rastel                | 6575    | France         | 43.80    | 7.40      |
| Leiria                   | 625     | Iberia         | 39.70    | -8.80     |
| Leopoldsdorf             | 4250    | N.-Cen. Europe | 48.30    | 16.40     |
| Lepinski Vir             | 10350   | Balkans        | 44.00    | 22.00     |
| Leshmi                   | 350     | South Asia     | 25.52    | 94.24     |
| Libesice                 | 4550    | N.-Cen. Europe | 50.50    | 13.80     |
| Liyudun                  | 6500    | South China    | 21.02    | 109.73    |
| Lochenice                | 4250    | N.-Cen. Europe | 50.30    | 15.80     |

| Site                                      | YearsBP | Region         | Latitude | Longitude |
|-------------------------------------------|---------|----------------|----------|-----------|
| Los Canes                                 | 7162    | Iberia         | 43.30    | -4.80     |
| Loschbour                                 | 8047    | France         | 49.80    | 6.20      |
| Lothal Mature Harappan                    | 4000    | South Asia     | 22.52    | 72.25     |
| Lucus Feroniae                            | 1850    | Italy          | 42.10    | 12.60     |
| Luis Lopez Collection                     | 50      | Iberia         | 38.70    | -9.10     |
| Lumby grusgrav                            | 1700    | Scand./Finland | 55.30    | 10.40     |
| Lyregård                                  | 1800    | Scand./Finland | 55.60    | 12.00     |
| Mahadaha                                  | 6300    | South Asia     | 26.00    | 82.19     |
| Makotrasy                                 | 2200    | N.-Cen. Europe | 50.10    | 14.20     |
| Male Brezno                               | 4550    | N.-Cen. Europe | 50.70    | 14.20     |
| Marbjerg                                  | 3975    | Scand./Finland | 55.70    | 12.20     |
| Melchendorf                               | 2950    | N.-Cen. Europe | 51.00    | 11.10     |
| Melk                                      | 3845    | N.-Cen. Europe | 48.20    | 15.30     |
| Mikulcice                                 | 1150    | N.-Cen. Europe | 48.80    | 17.10     |
| Mini-athiliya                             | 5650    | South Asia     | 6.12     | 80.94     |
| Mistihalj                                 | 550     | Balkans        | 42.50    | 18.40     |
| Moedling                                  | 1225    | N.-Cen. Europe | 48.10    | 16.30     |
| Moirans                                   | 250     | France         | 45.70    | 5.50      |
| Moita de Sebastiao                        | 7025    | Iberia         | 39.10    | -8.70     |
| Mokruvky                                  | 4250    | N.-Cen. Europe | 49.00    | 16.90     |
| Molara                                    | 9632    | Italy          | 38.10    | 13.30     |
| Mondeval                                  | 8138    | Italy          | 46.50    | 12.20     |
| Most                                      | 4550    | N.-Cen. Europe | 50.50    | 13.60     |
| Muge Arruda                               | 7296    | Iberia         | 39.10    | -8.40     |
| Muuksi Hundikangrute 5 kalme<br>(Kuusalu) | 2700    | Baltics        | 59.50    | 25.53     |
| Næstved Mark                              | 1700    | Scand./Finland | 55.20    | 11.80     |
| Nagajunakonda Megalithic                  | 2550    | South Asia     | 16.52    | 79.24     |
| Nahal Ein Gev                             | 24000   | West Asia      | 32.78    | 35.67     |
| Nahal-Oren                                | 12905   | West Asia      | 32.70    | 34.90     |
| Neiyangyuang                              | 3187    | North China    | 35.00    | 110.00    |
| Neuessing                                 | 21922   | N.-Cen. Europe | 48.90    | 11.80     |
| Nevasa                                    | 3250    | South Asia     | 22.94    | 77.61     |
| Nevasa                                    | 1875    | South Asia     | 19.55    | 74.93     |
| Niederbosa                                | 4950    | N.-Cen. Europe | 51.30    | 11.00     |
| Nordenbrogård                             | 1900    | Scand./Finland | 54.80    | 10.70     |
| Oberkassel                                | 14241   | N.-Cen. Europe | 50.70    | 7.20      |
| Øbjerggård                                | 1800    | Scand./Finland | 55.10    | 11.80     |
| Obrnice                                   | 4550    | N.-Cen. Europe | 50.50    | 13.70     |
| Observance(OBS)                           | 250     | France         | 43.30    | 5.40      |
| Ohalo 2                                   | 19000   | West Asia      | 32.72    | 35.57     |
| Ohalo 2                                   | 19000   | West Asia      | 32.72    | 35.57     |

| Site                        | YearsBP | Region         | Latitude | Longitude |
|-----------------------------|---------|----------------|----------|-----------|
| Olmo di Nogara              | 3400    | Italy          | 45.20    | 11.10     |
| Opava-Pivovar               | 650     | N.-Cen. Europe | 49.90    | 17.90     |
| Orlishausen                 | 4550    | N.-Cen. Europe | 51.10    | 11.20     |
| Østrup Mose                 | 5182    | Scand./Finland | 55.60    | 11.50     |
| Ostuni                      | 29190   | Italy          | 40.70    | 17.50     |
| Otterup                     | 1075    | Scand./Finland | 55.50    | 10.40     |
| Over Vindinge               | 3975    | Scand./Finland | 55.10    | 11.90     |
| P37                         | 4225    | Nile           | 19.63    | 30.39     |
| Pada kalmistu (Viru-Nigula) | 1000    | Baltics        | 59.43    | 26.71     |
| Padina                      | 7860    | Balkans        | 44.60    | 22.00     |
| Padri                       | 2000    | South Asia     | 22.37    | 72.58     |
| Paglicci                    | 28396   | Italy          | 41.70    | 13.60     |
| Pandu Rajar Dhibi           | 3000    | South Asia     | 23.57    | 87.65     |
| Parabita (Veneri)           | 26406   | Italy          | 40.10    | 18.10     |
| Paviland                    | 33700   | Britain        | 51.50    | 4.30      |
| Pavlov                      | 4250    | N.-Cen. Europe | 50.10    | 14.20     |
| Pavlov                      | 31039   | N.-Cen. Europe | 48.90    | 16.60     |
| Peqi'in (TAU)               | 6300    | West Asia      | 32.97    | 35.33     |
| Piazza della Signoria       | 650     | Italy          | 44.10    | 11.30     |
| Piklihal Upper Neolithic    | 2950    | South Asia     | 15.97    | 76.45     |
| Pitten                      | 3450    | N.-Cen. Europe | 47.70    | 16.20     |
| Plotiste                    | 4250    | N.-Cen. Europe | 50.20    | 15.80     |
| Pochampad                   | 3125    | South Asia     | 18.83    | 78.33     |
| Pohorelice                  | 4550    | N.-Cen. Europe | 49.00    | 16.50     |
| Pontcharaud                 | 6100    | France         | 45.80    | 3.10      |
| Ponte S. Pietro             | 5300    | Italy          | 42.54    | 11.76     |
| Poplze                      | 4550    | N.-Cen. Europe | 50.40    | 14.00     |
| Poregård                    | 5025    | Scand./Finland | 55.00    | 10.70     |
| Porsmose                    | 5449    | Scand./Finland | 55.30    | 11.70     |
| Porvoo                      | 250     | Scand./Finland | 60.40    | 25.70     |
| Postoloprty                 | 4550    | N.-Cen. Europe | 50.40    | 13.70     |
| Pottenbrunn                 | 3845    | N.-Cen. Europe | 48.20    | 15.70     |
| Poundbury                   | 1650    | Britain        | 50.70    | -2.50     |
| Predmostí                   | 30965   | N.-Cen. Europe | 49.50    | 17.40     |
| Prosetice                   | 4550    | N.-Cen. Europe | 50.60    | 13.80     |
| Quadrella                   | 1800    | Italy          | 41.00    | 14.60     |
| R12                         | 6450    | Nile           | 19.37    | 30.61     |
| Radegast                    | 4550    | N.-Cen. Europe | 51.40    | 12.90     |
| Radovesice                  | 2200    | N.-Cen. Europe | 50.40    | 14.10     |
| Radovesice                  | 4250    | N.-Cen. Europe | 50.40    | 14.10     |
| Rakefet                     | 11470   | West Asia      | 32.70    | 34.90     |
| Rakhghari                   | 4450    | South Asia     | 29.29    | 76.11     |

| Site                                | YearsBP | Region         | Latitude | Longitude |
|-------------------------------------|---------|----------------|----------|-----------|
| Rakhghari                           | 4450    | South Asia     | 29.29    | 76.11     |
| Raqefet                             | 11470   | West Asia      | 32.73    | 35.05     |
| Ratzersdorf                         | 5150    | N.-Cen. Europe | 48.20    | 15.70     |
| Rebala kalme (Jöelähtme)            | 1975    | Baltics        | 59.45    | 25.10     |
| Rebala Lastekangur nr 2 (Jöelähtme) | 2700    | Baltics        | 59.45    | 25.10     |
| Renko                               | 320     | Scand./Finland | 60.90    | 24.30     |
| Ripa Tetta                          | 7500    | Italy          | 41.50    | 15.33     |
| Riparo Continenza                   | 12095   | Italy          | 42.00    | 13.50     |
| Riparo Tagliente                    | 16332   | Italy          | 45.60    | 11.00     |
| Rochereil                           | 13000   | France         | 45.70    | 0.60      |
| Romanelli                           | 13000   | Italy          | 40.00    | 18.40     |
| Romito                              | 13051   | Italy          | 39.90    | 15.90     |
| Roselle                             | 1250    | Italy          | 42.80    | 11.10     |
| Rousí'nov                           | 4550    | N.-Cen. Europe | 49.20    | 16.90     |
| Rue Jacques Brel                    | 1825    | France         | 45.80    | -0.60     |
| Rupar                               | 3750    | South Asia     | 30.90    | 76.55     |
| S Pappinayakanpatta                 | 2000    | South Asia     | 9.81     | 77.70     |
| Saint Germain-la-Rivière            | 19013   | France         | 44.90    | 0.20      |
| Saint-Martin-de-Corléan             | 4400    | Italy          | 45.74    | 7.30      |
| Samari                              | 7500    | Italy          | 40.02    | 18.02     |
| San Baudelio de Berlanga            | 850     | Iberia         | 41.40    | -2.80     |
| San Benedetto-Iglesias              | 5800    | Italy          | 39.36    | 8.53      |
| San Teodoro                         | 13000   | Italy          | 38.00    | 14.60     |
| Sanderumgård                        | 1700    | Scand./Finland | 56.00    | 10.00     |
| Santa Maria de Hito                 | 1050    | Iberia         | 42.80    | -3.90     |
| Sarai Nahar Rai                     | 10000   | South Asia     | 25.81    | 81.84     |
| Sassari                             | 100     | Italy          | 40.80    | 8.80      |
| Scab'e Arriu                        | 4600    | Italy          | 39.67    | 8.89      |
| Schafstadt                          | 4550    | N.-Cen. Europe | 51.40    | 11.80     |
| Scheelminde                         | 1900    | Scand./Finland | 57.00    | 9.90      |
| Schela Cladovei                     | 9271    | Balkans        | 46.30    | 22.40     |
| Schleinbach                         | 3960    | N.-Cen. Europe | 48.40    | 16.50     |
| Schlotheim                          | 7150    | N.-Cen. Europe | 51.20    | 10.40     |
| Schonstedt                          | 4950    | N.-Cen. Europe | 51.10    | 10.60     |
| Sejrø                               | 6025    | Scand./Finland | 55.90    | 11.20     |
| Sha Ling                            | 30      | South China    | 22.00    | 114.00    |
| Shenyang                            | 257     | North China    | 41.00    | 123.00    |
| Shiqmim                             | 6150    | West Asia      | 31.10    | 34.50     |
| Shrewton                            | 3950    | Britain        | 51.20    | -1.90     |
| Sigtuna (Nunnan)                    | 1005    | Scand./Finland | 59.60    | 17.70     |
| Simonsborg                          | 1900    | Scand./Finland | 55.40    | 11.70     |
| Siracusani                          | 150     | Italy          | 37.10    | 15.30     |

| Site                           | YearsBP | Region         | Latitude | Longitude |
|--------------------------------|---------|----------------|----------|-----------|
| Siroke Trebcice                | 4550    | N.-Cen. Europe | 50.30    | 13.40     |
| Skafterup Mark                 | 1900    | Scand./Finland | 55.20    | 11.50     |
| Skateholm I                    | 6950    | Scand./Finland | 55.40    | 13.50     |
| Skendleby                      | 5000    | Britain        | 53.20    | 0.10      |
| Sondershausen                  | 7300    | N.-Cen. Europe | 51.40    | 10.90     |
| Spitalfields                   | 225     | Britain        | 51.50    | -0.10     |
| St.Tuborg                      | 3975    | Scand./Finland | 55.70    | 12.50     |
| Staxton                        | 4150    | Britain        | 54.20    | -0.40     |
| Stonehenge                     | 4350    | Britain        | 51.20    | -1.80     |
| Store Grandløse                | 1900    | Scand./Finland | 55.70    | 11.80     |
| Store Keldbjerg                | 1900    | Scand./Finland | 54.70    | 10.70     |
| Store Lyng                     | 5167    | Scand./Finland | 55.60    | 11.50     |
| Sunghir                        | 27530   | Scand./Finland | 56.10    | 40.40     |
| T. Narsipur                    | 3500    | South Asia     | 12.20    | 76.90     |
| Tamula Asula (Røuge)-Early Neo | 5883    | Baltics        | 57.84    | 26.99     |
| Tamula Asula (Røuge)-Late Neo  | 4940    | Baltics        | 57.84    | 26.99     |
| Taohuayuan                     | 380     | North China    | 40.07    | 117.43    |
| Tenner                         | 3750    | South Asia     | 16.49    | 80.81     |
| Terrera Del Reloh, 1983        | 3450    | Iberia         | 37.60    | -3.10     |
| Teviec                         | 7363    | France         | 48.10    | -3.00     |
| Toedling                       | 4250    | N.-Cen. Europe | 48.20    | 14.40     |
| Trasano                        | 7500    | Italy          | 40.67    | 16.64     |
| Tucapy                         | 4550    | N.-Cen. Europe | 49.00    | 17.30     |
| Tuchengzi                      | 2351    | North China    | 41.00    | 112.00    |
| Tuchomerice (BBC)              | 4250    | N.-Cen. Europe | 50.10    | 14.30     |
| Tybrind Vig                    | 7663    | Scand./Finland | 55.80    | 9.90      |
| Udestedt (2)                   | 4550    | N.-Cen. Europe | 51.00    | 11.10     |
| University of Toronto te       | 40      | South Asia     | 22.57    | 88.37     |
| Unseburg                       | 4550    | N.-Cen. Europe | 51.90    | 11.50     |
| Unseburg                       | 8550    | N.-Cen. Europe | 52.30    | 11.50     |
| Unterhautzenthal               | 3960    | N.-Cen. Europe | 48.40    | 16.10     |
| 'Uyyun al-Hammam               | 16500   | West Asia      | 32.50    | 35.70     |
| Uzzo                           | 10455   | Italy          | 38.20    | 12.70     |
| Vængesø 2                      | 6348    | Scand./Finland | 56.10    | 10.50     |
| Varpelev                       | 1700    | Scand./Finland | 55.40    | 12.30     |
| Västerbjers                    | 4700    | Scand./Finland | 57.60    | 18.70     |
| Vatte di Zambana               | 8612    | Italy          | 46.20    | 11.10     |
| Veddah                         | 100     | South Asia     | 7.54     | 81.50     |
| Veerabyina Kunta               | 3750    | South Asia     | 17.34    | 82.11     |
| Velika Ves                     | 4550    | N.-Cen. Europe | 50.30    | 13.40     |
| Vemmeltofte Skovridergå        | 1700    | Scand./Finland | 55.20    | 12.30     |
| Veyrier                        | 5523    | N.-Cen. Europe | 46.20    | 6.20      |

| Site                         | YearsBP | Region          | Latitude | Longitude |
|------------------------------|---------|-----------------|----------|-----------|
| Viby                         | 4550    | Scand./Finland  | 55.50    | 12.00     |
| Vicenne Campochiaro          | 1300    | Italy           | 41.50    | 14.50     |
| Vikletice                    | 4550    | N.-Cen. Europe  | 50.40    | 13.40     |
| Viksø                        | 5753    | Scand./Finland  | 55.80    | 12.20     |
| Villabruna                   | 14204   | Italy           | 46.10    | 11.50     |
| Villanueva de Soportiva      | 1025    | Iberia          | 42.80    | -3.10     |
| Visby                        | 4700    | Scand./Finland  | 57.60    | 18.30     |
| Vlasac                       | 7860    | Balkans         | 44.50    | 22.00     |
| Vrbice                       | 4550    | N.-Cen. Europe  | 48.90    | 16.90     |
| Vrsany                       | 700     | N.-Cen. Europe  | 50.50    | 13.10     |
| Vyskov                       | 4550    | N.-Cen. Europe  | 49.20    | 17.00     |
| Wadi Makkuk                  | 6250    | West Asia       | 31.80    | 35.50     |
| Wadi Shu'eib                 | 8025    | West Asia       | 31.96    | 35.70     |
| Wadi-Mataha                  | 14000   | West Asia       | 30.00    | 35.00     |
| Wayland's Smithy I           | 5500    | Britain         | 51.60    | -1.60     |
| Weißensee                    | 4550    | N.-Cen. Europe  | 52.50    | 13.50     |
| West Kennet                  | 5600    | Britain         | 51.40    | -1.90     |
| Westerhus                    | 800     | Scand./Finland  | 63.20    | 14.40     |
| Wetwang Slack                | 2250    | Britain         | 54.00    | -0.60     |
| Wilsford S. Lake             | 3875    | Britain         | 51.10    | -1.80     |
| Wuernitz                     | 3960    | N.-Cen. Europe  | 48.40    | 16.40     |
| Xaghra <sup>1</sup>          | 4650    | Southern Europe | 36.05    | 14.26     |
| Yeleswaram                   | 2250    | South Asia      | 16.47    | 79.22     |
| York                         | 825     | Britain         | 54.00    | -1.10     |
| Zabovresky                   | 4250    | N.-Cen. Europe  | 50.00    | 14.40     |
| Zidovice                     | 4250    | N.-Cen. Europe  | 50.40    | 14.20     |
| Zvejnieki - Early Mesolithic | 8825    | Baltics         | 57.78    | 25.23     |
| Zvejnieki-Early Neolithic    | 6625    | Baltics         | 57.78    | 25.23     |
| Zvejnieki-Late Bronze Age    | 2725    | Baltics         | 57.78    | 25.23     |
| Zvejnieki-Late Mesolithic    | 7000    | Baltics         | 57.78    | 25.23     |
| Zvejnieki-Middle Mesolithic  | 7825    | Baltics         | 57.78    | 25.23     |
| Zvejnieki-Middle Neolithic   | 5575    | Baltics         | 57.78    | 25.23     |
| Zwentendorf                  | 975     | N.-Cen. Europe  | 48.60    | 16.40     |

<sup>1</sup> On the small archipelago of Malta, a multi proxy approach drawing on artistic representation, isotopic studies, animal slaughter patterns and life course profiles of health and disease from human remains suggests a local variation in metabolic outcomes amongst a minority of the population. Figurines (15) show that high body mass was observed by prehistoric populations, but human osteological studies suggest that this was on a low frequency (16). We can hypothesize that poor health and diet in the early infant stages of the life course, detectable from the osteological record (Power et al., 2022), may have selectively led to high body mass in some individuals surviving to adulthood whose diet was enriched by

dairy products, as interpreted from isotopic studies (18), lipid analysis (19) and the slaughter patterns of dairy animals (20).

### Supplementary methods:

Statistical tests and box plots were generated in SPSS for Windows v.28 (IBM, Inc.). Scatterplots were generated in R v.4.0.4 (21) using RStudio v.2022.02.3 (22), using the packages ggplot2 (23) and scales (24). Curves were fitted using lowess with smoothing (“span”) set at 0.8 except where data were more sparse or unevenly distributed meaning that higher smoothing values were needed to ensure a visually acceptable line fit. In these cases, the smoothing parameter is specified in the figure.

Heat maps were also generated in R v.4.0.4 (21) using RStudio v.2022.02.3 (22), using the packages sp (25), rgdal (26), scales (24), raster (27), dplyr (28), akima (29) and tmap (30), and with code modified from Rochette (2017). Data were interpolated using a squared inverse distance weighting, and with distances calculated based on great circle distances. Raster files of interpolated data were imported into QGIS Desktop 3.16.8 (32) for final presentation.

Example code for scatterplots with lowess curves:

```
# load relevant libraries
```

```
library(ggplot2)
library(scales)
```

```
# region 2 Southern Europe
```

```
lowess<-subset(GlobalSubsistenceBodySize_Final_2022_06_03, RegCode2 == "2" & (Sex == "M" | Sex == "F"),select=c(NEWBM, YearsBP, DateNeg,RegCode2,Sex))
```

```
ggplot(data=lowess, aes(x=YearsBP, y=NEWBM,col=Sex,))+stat_smooth(span = 0.9) +
scale_x_reverse(limits=c(13000,0),expand = c(0,0), labels = label_number(scale = 1e-3, accuracy = 1),
breaks = seq(13000, 0, by = -1000) , minor_breaks = NULL) + xlab("Thousand years before present") +
ylab("Body mass (kg)") + scale_y_continuous(limits=c(40,90),expand=c(0,0), minor_breaks = NULL) +
geom_point(alpha = 0.2) + theme(text = element_text(size = 18))
```

Example code for stature heat maps:

```
# load relevant libraries
```

```
library(sp)
library(rgdal)
library(scales)
library(raster)
library(dplyr)
library(akima)
library(tmap)
```

```
# Select data
```



```
htEurope<-subset(SiteMeans.Europe, YearsBP>=10000, select=c(lat,lon,Stat_Mean))
```

```
# Set up a grid and project the dataset (latitude and longitude columns are labelled 'lat' and 'lon' respectively)
```

```
par(mfrow=c(2,1), mar=c(0,0,0,0))  
grd <- expand.grid(lon = seq(-12,30, by = 5),  
                  lat = seq(30, 80, by=5))  
coordinates(grd) <- ~lon + lat  
gridded(grd) <- TRUE  
plot(grd, add=F, col=grey(.8))
```

```
coordinates(htEurope) = ~lon + lat  
points(htEurope, col=htEurope$Stat_Mean + 2, pch=16, cex=.6)
```

```
# Set the number of datapoints on the grid which will then be used to calculate distances and create the interpolated data
```

```
nx <- 421  
ny <- 401  
xo <- seq(-12, 39, len=nx)  
yo <- seq(30, 69, len=ny)  
xy <- as.data.frame(coordinates(htEurope))
```

```
# Create raster image
```

```
htrEurope <- raster(nrows=ny, ncols=nx, crs='+proj=longlat',  
                  xmn=-12, xmx=30, ymn=30, ymx=70)
```

```
# Calculate distance between points and raster
```

```
htEurope.htrEurope.dists <- spDists(x = coordinates(htEurope), y = coordinates(htrEurope), longlat = TRUE)
```

```
# Inverse distance weighted interpolation
```

```
idp <- 2  
inv.w <- (1/(htEurope.htrEurope.dists^idp))  
z <- (t(inv.w) %*% matrix(htEurope$Stat_Mean)) / apply(inv.w, 2, sum)
```

```
htpred.Europe <- htrEurope  
values(htpred.Europe) <- z
```

```
# Export the data as raster file
```

```
writeRaster(htpred.Europe, filename = "HT_IDW2_Europe_pre_10000Y.asc")
```

**Note on use of dates:** Within the text of this paper we use BP or calBP to refer to dates that reflect specific radiocarbon dates, and kya to refer to date ranges and approximate timing of specific cultural transitions.

**Table S2: Stature estimation formulae from femur maximum length**

| Region          | Femur stature equation Male | Femur stature equation Female | Femur Stature Equation Generic | Reference |
|-----------------|-----------------------------|-------------------------------|--------------------------------|-----------|
| Levant          | .2257 x FXL + 63.93         | .2340 x FXL + 56.99           | Avg of Male and Female         | (33)      |
| Southern Europe | .272 x FXL + 42.85          | .269 x FXL + 43.56            | .277 x FXL + 40.50             | (34)      |
| Central Europe  | .272 x FXL + 42.85          | .269 x FXL + 43.56            | .277 x FXL + 40.50             | (34)      |
| Northern Europe | .272 x FXL + 42.85          | .269 x FXL + 43.56            | .277 x FXL + 40.50             | (34)      |
| Nile Valley     | .2257 x FXL + 63.93         | .2340 x FXL + 56.99           | Avg of Male and Female         | (33)      |
| China           | .2775 x FXL + 43.051        | .2568 x FXL + 48.783          | .2964 x FXL + 33.354           | (35)      |
| South Asia      | .251 x FXL + 51.482         | .266 x FXL + 42.384           | Avg of Male and Female         | (36)      |

**Table S3: Stature Estimation formulae from tibia maximum length**

| Region          | Tibia Stature Equation Male | Tibia Stature Equation Female | Tibia Stature Equation Generic | Reference |
|-----------------|-----------------------------|-------------------------------|--------------------------------|-----------|
| Levant          | .2554 x TXL + 69.21         | .2699 x TXL + 61.08           | Avg of Male and Female         | (33)      |
| Southern Europe | .309 x TXL + 52.04          | .292 x TXL + 56.94            | .302 x TXL + 51.36             | (34)      |
| Central Europe  | .309 x TXL + 52.04          | .292 x TXL + 56.94            | .313 x TXL + 50.11             | (34)      |
| Northern Europe | .309 x TXL + 52.04          | .292 x TXL + 56.94            | .302 x TXL + 51.36             | (34)      |
| Nile Valley     | .2554 x TXL + 69.21         | .2699 x TXL + 61.08           | Avg of Male and Female         | (33)      |
| China           | .2864 x TXL + 61.639        | .2739 x TXL + 61.749          | .3250 x TXL + 45.654           | (35)      |
| South Asia      | .294 * TXL + 53.516         | .286 x TXL + 51.880           | Avg of Male and Female         | (36)      |

**Table S4: Body Mass Estimation Equations**

| Region          | Body Mass Equation - Femoral Head Diameter | 2. Body Mass Equation Tibia prox breadth | Reference |
|-----------------|--------------------------------------------|------------------------------------------|-----------|
| Levant          | 2.262 x FH - 38.7                          | 1.623 x TPB - 52.7                       | (37)      |
| Southern Europe | 2.262 x FH - 38.7                          | 1.623 x TPB - 52.7                       | (37)      |
| Central Europe  | 2.262 x FH - 38.7                          | 1.623 x TPB - 52.7                       | (37)      |
| Northern Europe | 2.262 x FH - 38.7                          | 1.623 x TPB - 52.7                       | (37)      |
| Nile Valley     | 2.262 x FH - 38.7                          | 1.623 x TPB - 52.7                       | (37)      |
| China           | 2.262 x FH - 38.7                          | 1.623 x TPB - 52.7                       | (37)      |
| South Asia      | 0.844 x FH + 0.876 (M)                     |                                          | (38)      |
|                 | 0.678 x FH + 1.377 (F)                     |                                          | (38)      |

Figure S2. Boxplots of Temporal variation in Stature and Body Mass, Pooled Samples

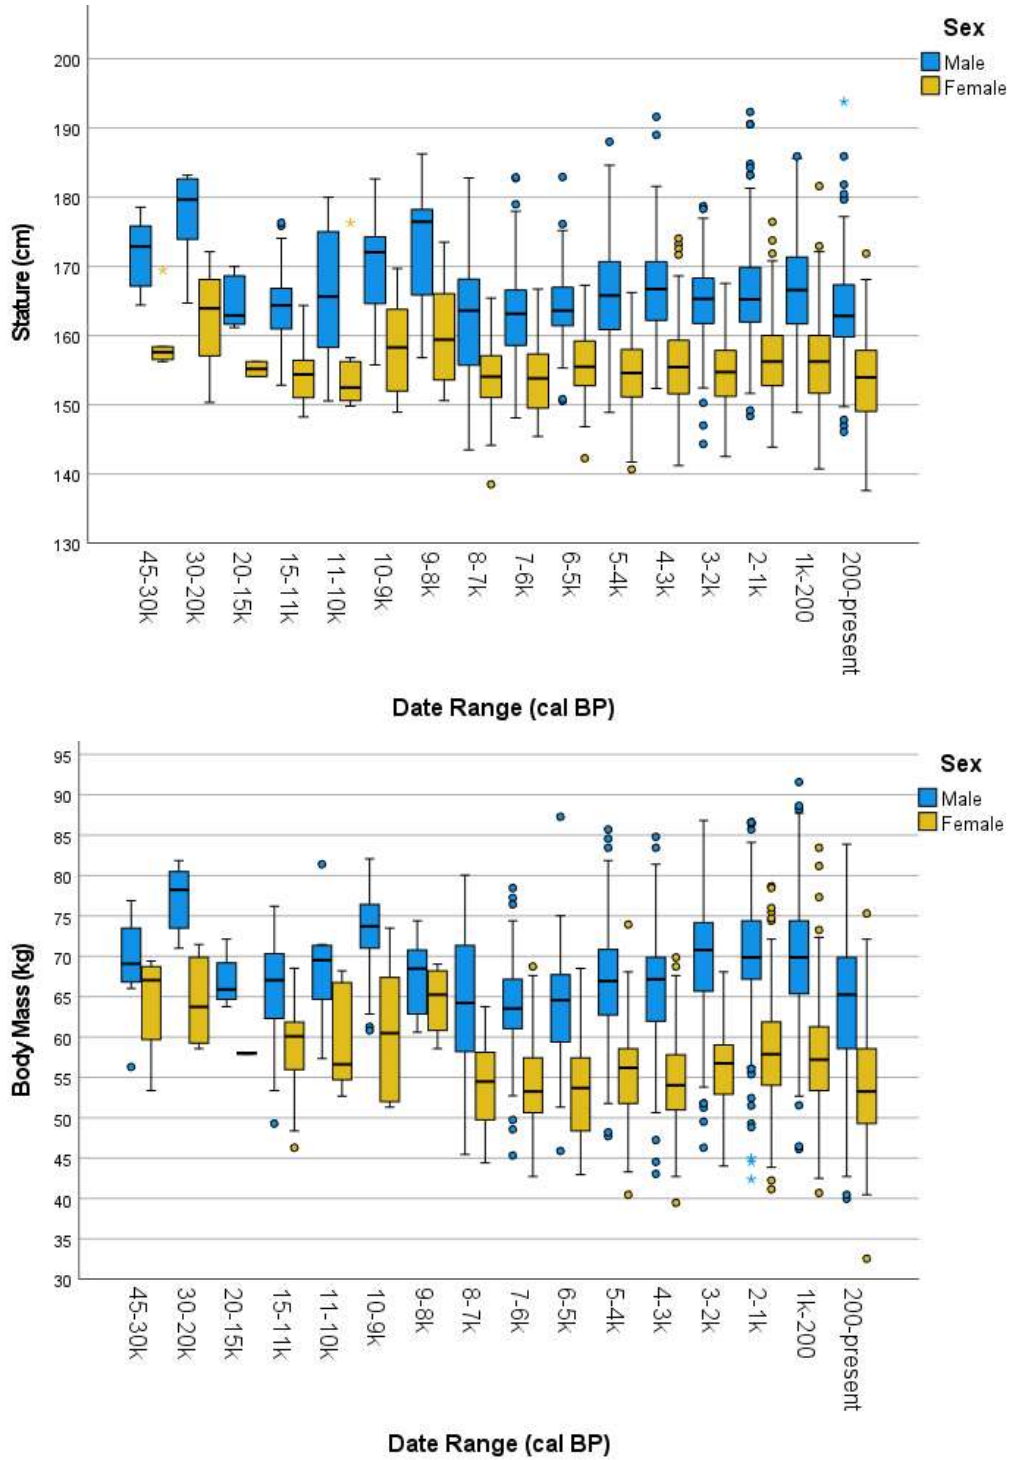

Figure S3. Boxplots of Temporal variation in Stature and Body Mass, Levantine Subsample

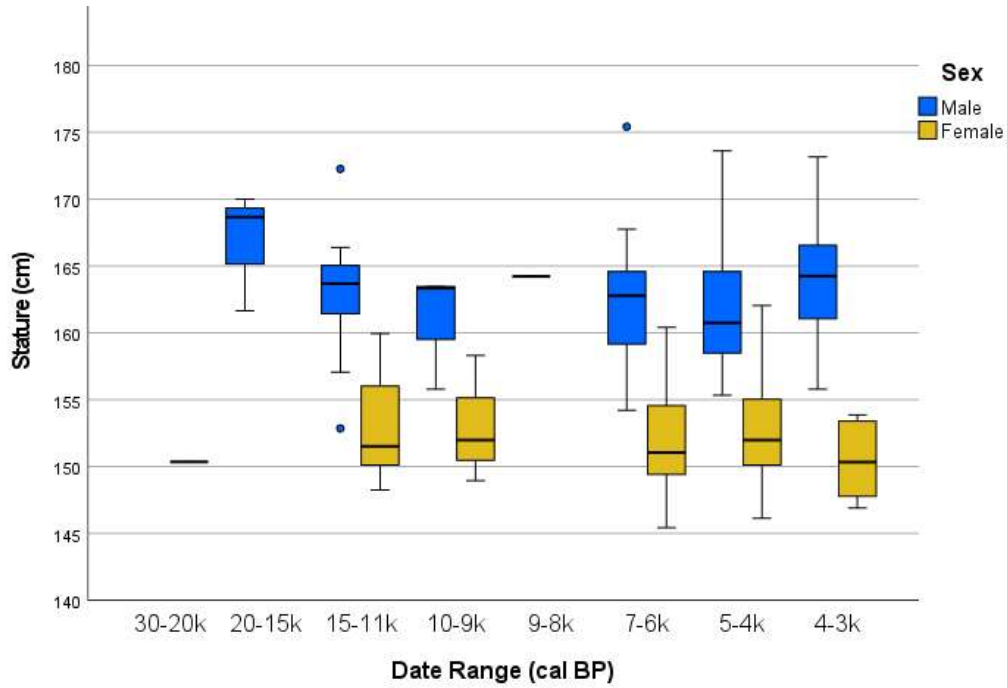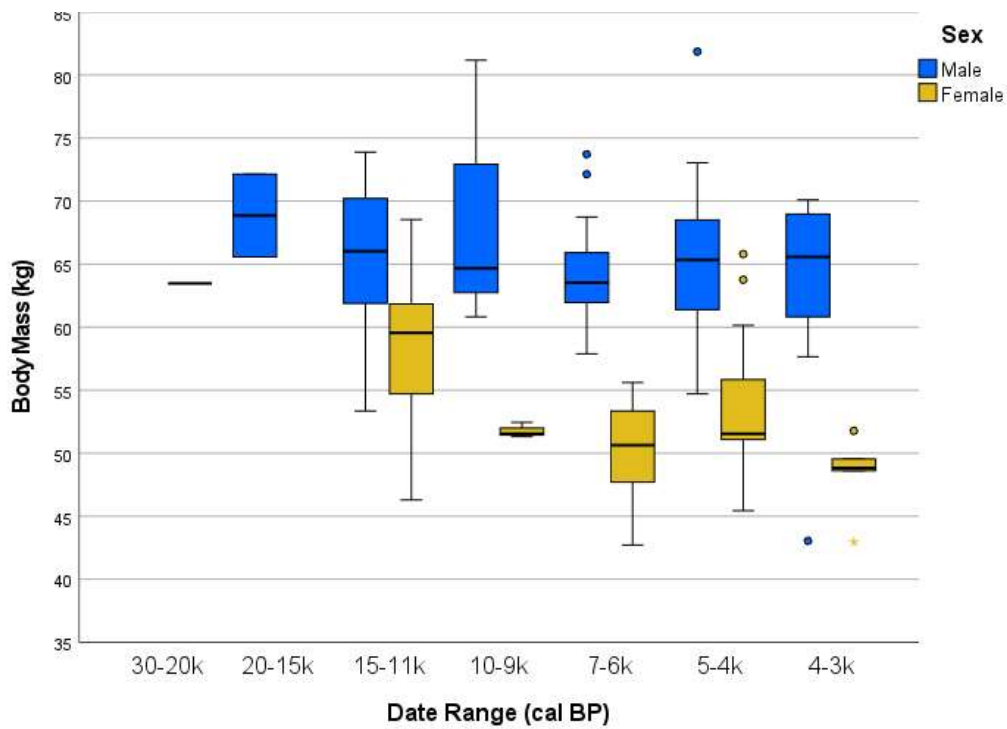

Figure S4: Boxplots of Temporal variation in Stature in Southern Europe

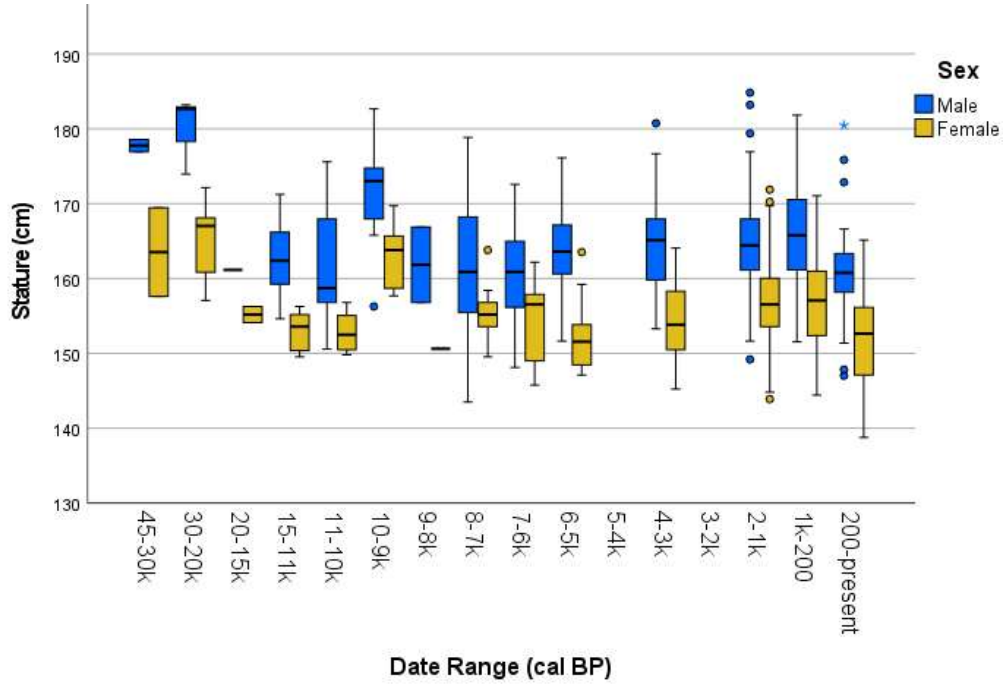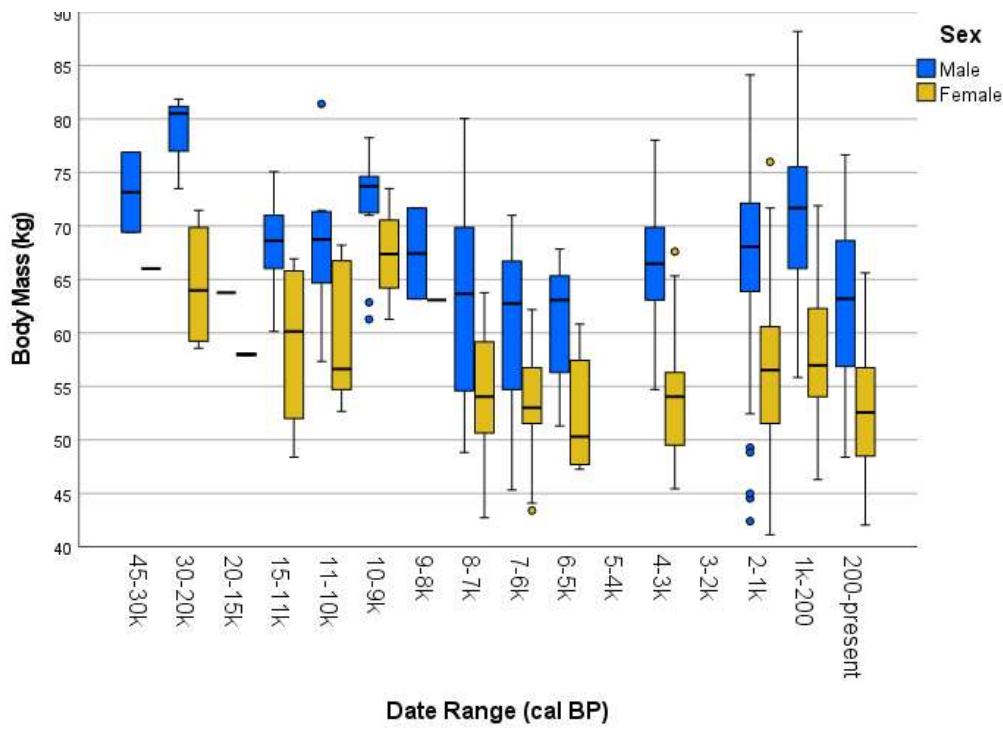

**Figure S5a:** Boxplots of Temporal variation in Stature in regions where there is evidence for strong selection for lactase persistence.

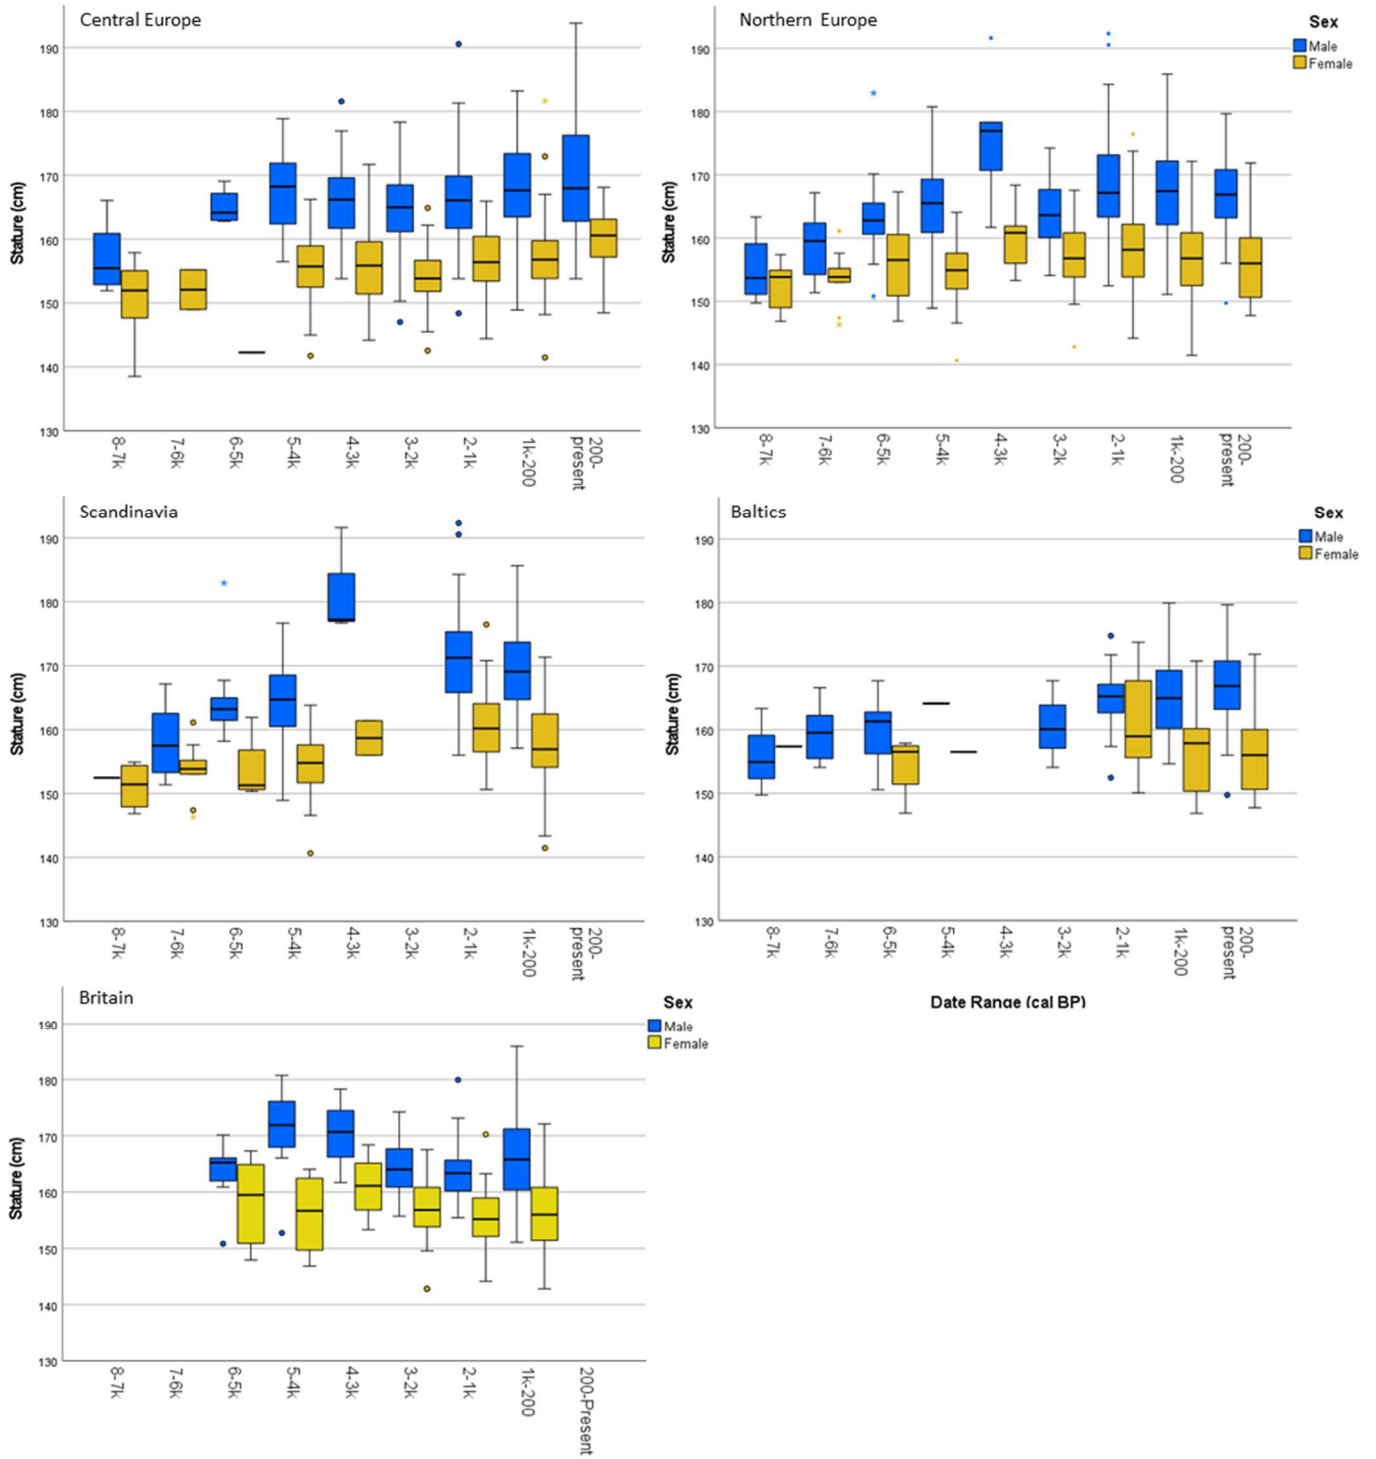

**Figure S5b:** Boxplots of Temporal variation in Body Mass in regions where there is evidence for strong selection for lactase persistence

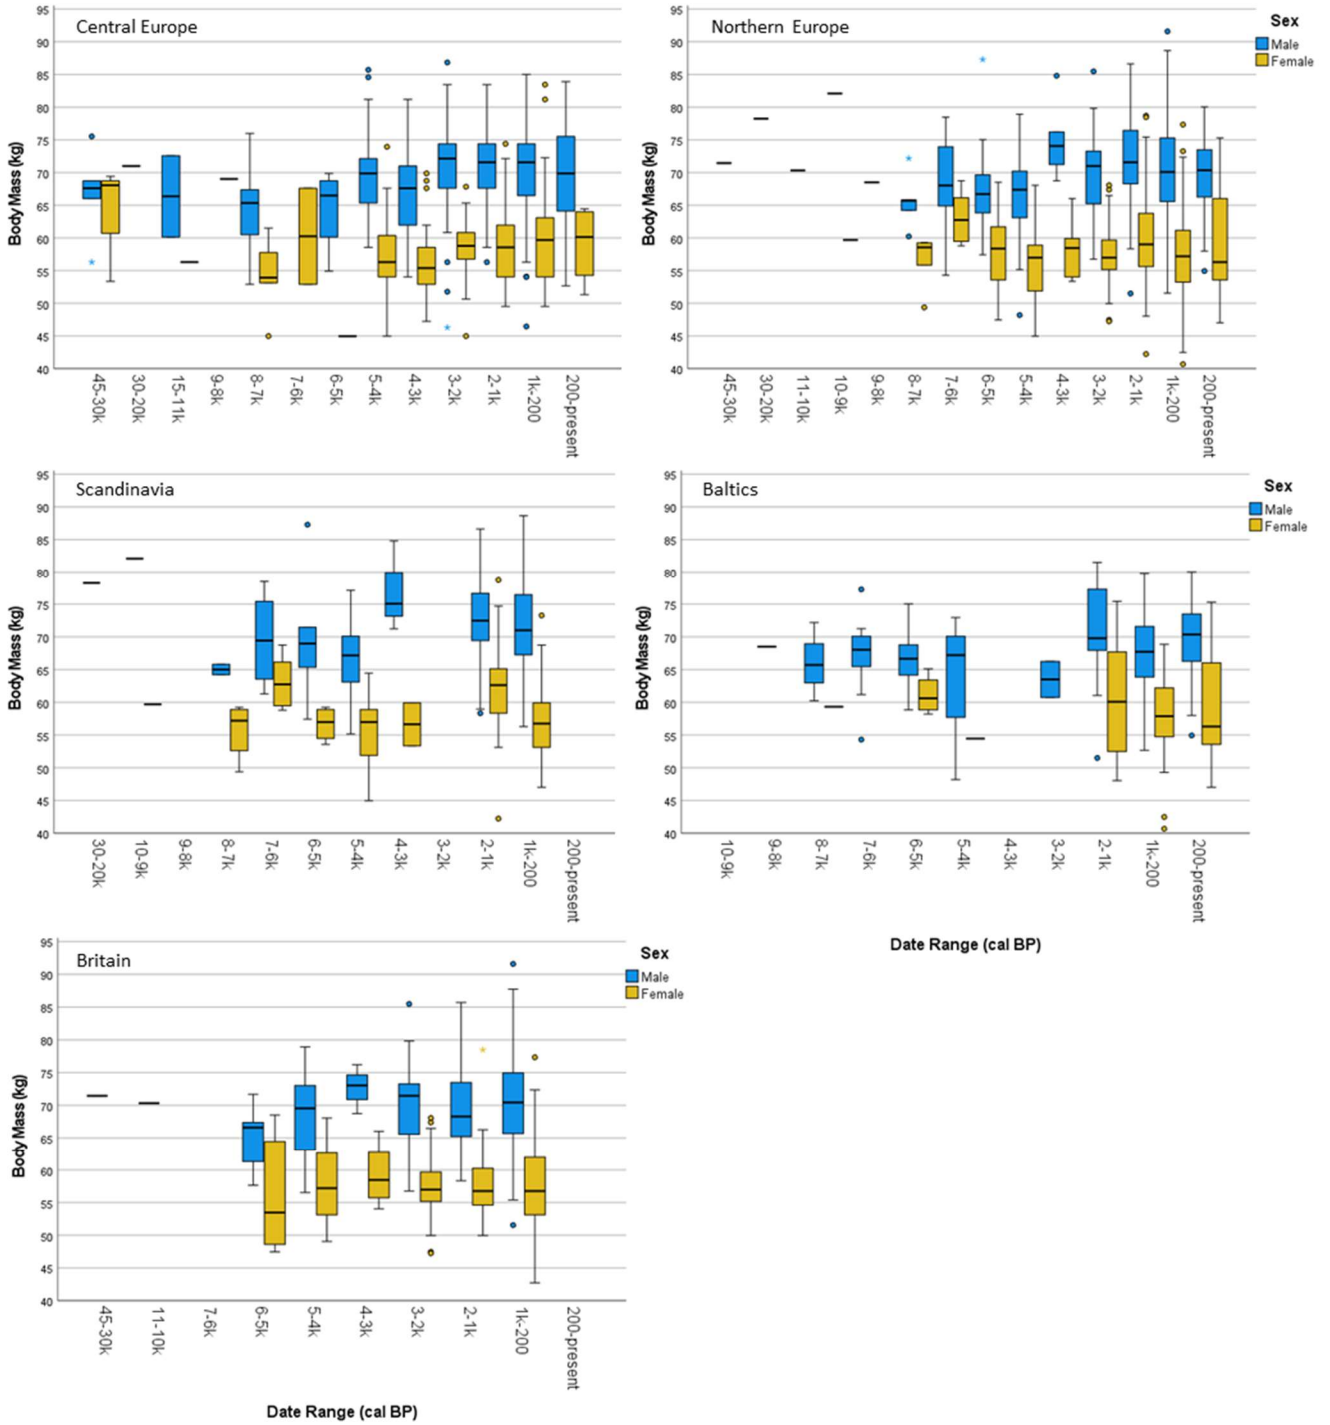

**Figure S6:** Boxplots of Temporal variation in Stature and Body Mass in China, South Asia, and the Nile Valley

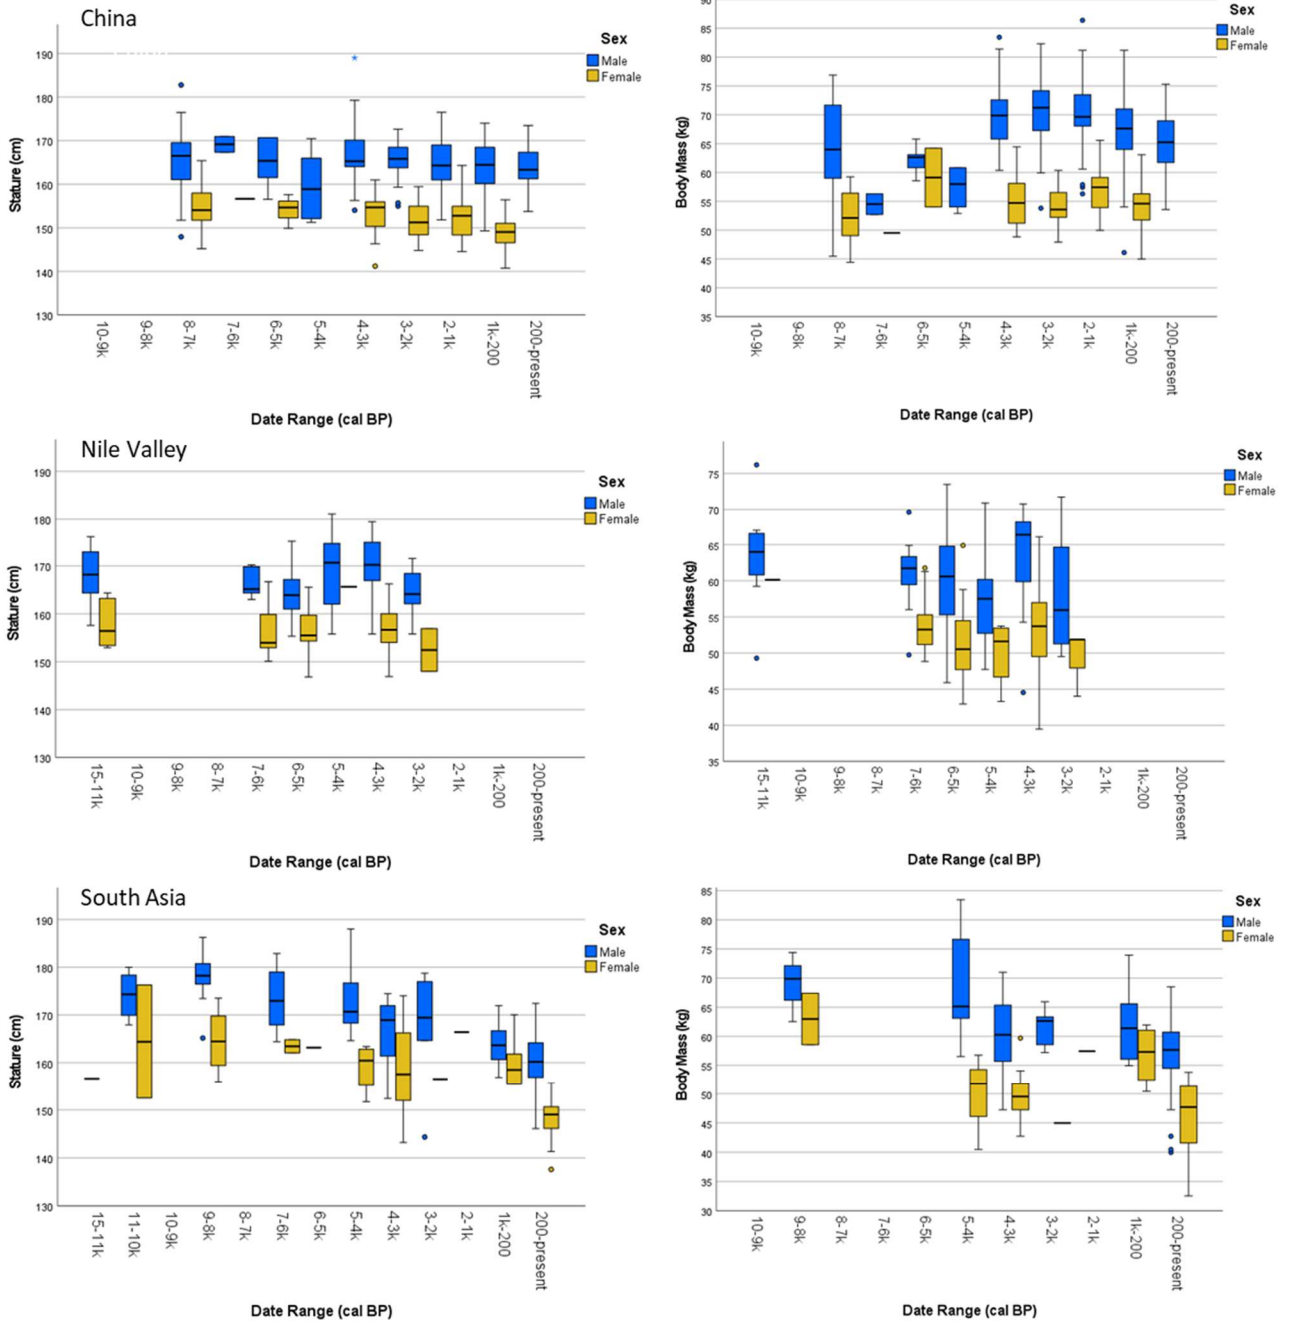



ANOVA results using Hochberg GT2 post-hoc tests on account of variable and uneven sample sizes are reported below to a significance level of  $\alpha=0.05$ . Values below  $\alpha=.1$  are highlighted to illustrate non-significant trends of interest.

**Table S5:** Levant Stature Male significant differences – Hochberg GT2 Post-Hoc Tests

|                            | 20-15k | 15-11k | 10-9k                      | 7-6k  | 5-4k  | 4-3k |
|----------------------------|--------|--------|----------------------------|-------|-------|------|
| 20-15k                     |        |        |                            |       |       |      |
| 15-11k                     | 0.773  |        |                            |       |       |      |
| 10-9k                      | 0.616  | 0.962  |                            |       |       |      |
| 7-6k                       | 0.652  | 0.993  | 0.998                      |       |       |      |
| 5-4k                       | 0.621  | 0.977  | 0.999                      | 1.000 |       |      |
| 4-3k                       | 0.909  | 0.993  | 0.858                      | 0.892 | 0.820 |      |
| Significant $p \leq 0.100$ |        |        | Significant $p \leq 0.050$ |       |       |      |

**Table S6:** Levant Stature Female significant differences – Hochberg GT2 Post-Hoc Tests

|                            | 15-11k | 10-9k | 7-6k                       | 5-4k  | 4-3k |
|----------------------------|--------|-------|----------------------------|-------|------|
| 15-11k                     |        |       |                            |       |      |
| 10-9k                      | 1.000  |       |                            |       |      |
| 7-6k                       | 0.939  | 0.985 |                            |       |      |
| 5-4k                       | 0.998  | 0.999 | 0.979                      |       |      |
| 4-3k                       | 0.578  | 0.887 | 0.937                      | 0.637 |      |
| Significant $p \leq 0.100$ |        |       | Significant $p \leq 0.050$ |       |      |

**Table S7:** Levant Body Mass Male significant differences – Hochberg GT2 Post-Hoc Tests

|                            | 20-15k | 15-11k | 10-9k                      | 7-6k  | 5-4k  | 4-3k |
|----------------------------|--------|--------|----------------------------|-------|-------|------|
| 20-15k                     |        |        |                            |       |       |      |
| 15-11k                     | 0.883  |        |                            |       |       |      |
| 10-9k                      | 1.000  | 0.985  |                            |       |       |      |
| 7-6k                       | 0.779  | 0.996  | 0.961                      |       |       |      |
| 5-4k                       | 0.902  | 1.000  | 0.990                      | 0.950 |       |      |
| 4-3k                       | 0.742  | 0.978  | 0.933                      | 0.997 | 0.938 |      |
| Significant $p \leq 0.100$ |        |        | Significant $p \leq 0.050$ |       |       |      |

**Table S8:** Levant Body Mass Female significant differences – Hochberg GT2 Post-Hoc Tests

|                            | 15-11k | 10-9k | 7-6k                       | 5-4k  | 4-3k |
|----------------------------|--------|-------|----------------------------|-------|------|
| 15-11k                     |        |       |                            |       |      |
| 10-9k                      | 0.135  |       |                            |       |      |
| 7-6k                       | 0.071  | 0.742 |                            |       |      |
| 5-4k                       | 0.350  | 0.534 | 0.257                      |       |      |
| 4-3k                       | 0.028  | 0.296 | 0.763                      | 0.110 |      |
| Significant $p \leq 0.100$ |        |       | Significant $p \leq 0.050$ |       |      |

**Table S9:** Southern Europe Stature Male significant differences - Hochberg GT2 Post-Hoc Tests

|          | 45-30k | 30-20k | 15-11k | 11-10k | 10-9k | 9-8k  | 8-7k                | 7-6k  | 6-5k  | 4-3k                | 2-1k  | 1k-200 |
|----------|--------|--------|--------|--------|-------|-------|---------------------|-------|-------|---------------------|-------|--------|
| 45-30k   |        |        |        |        |       |       |                     |       |       |                     |       |        |
| 30-20k   | 1.000  |        |        |        |       |       |                     |       |       |                     |       |        |
| 15-11k   | 0.176  | 0.004  |        |        |       |       |                     |       |       |                     |       |        |
| 11-10k   | 0.207  | 0.007  | 1.000  |        |       |       |                     |       |       |                     |       |        |
| 10-9k    | 1.000  | 0.983  | 0.025  | 0.097  |       |       |                     |       |       |                     |       |        |
| 9-8k     | 0.695  | 0.187  | 1.000  | 1.000  | 0.963 |       |                     |       |       |                     |       |        |
| 8-7k     | 0.061  | 0.000  | 1.000  | 1.000  | 0.000 | 1.000 |                     |       |       |                     |       |        |
| 7-6k     | 0.045  | 0.000  | 1.000  | 1.000  | 0.000 | 1.000 | 1.000               |       |       |                     |       |        |
| 6-5k     | 0.310  | 0.008  | 1.000  | 1.000  | 0.050 | 1.000 | 1.000               | 1.000 |       |                     |       |        |
| 4-3k     | 0.411  | 0.012  | 1.000  | 1.000  | 0.057 | 1.000 | 0.979               | 0.957 | 1.000 |                     |       |        |
| 2-1k     | 0.444  | 0.012  | 1.000  | 1.000  | 0.032 | 1.000 | 0.485               | 0.619 | 1.000 | 1.000               |       |        |
| 1k-200   | 0.667  | 0.033  | 0.994  | 1.000  | 0.210 | 1.000 | 0.071               | 0.177 | 1.000 | 1.000               | 1.000 |        |
| 200-pres | 0.030  | 0.000  | 1.000  | 1.000  | 0.000 | 1.000 | 1.000               | 1.000 | 0.998 | 0.414               | 0.014 | 0.001  |
|          |        |        |        |        |       |       | Significant p≤0.100 |       |       | Significant p≤0.050 |       |        |

**Table S10:** Southern Europe Stature Female significant differences - Hochberg GT2 Post-Hoc Tests

|          | 45-30k | 30-20k | 20-15k | 15-11k | 11-10k | 10-9k | 8-7k                | 7-6k  | 6-5k  | 4-3k                | 2-1k  | 1k-200 |
|----------|--------|--------|--------|--------|--------|-------|---------------------|-------|-------|---------------------|-------|--------|
| 45-30k   |        |        |        |        |        |       |                     |       |       |                     |       |        |
| 30-20k   | 1.000  |        |        |        |        |       |                     |       |       |                     |       |        |
| 20-15k   | 1.000  | 0.930  |        |        |        |       |                     |       |       |                     |       |        |
| 15-11k   | 0.841  | 0.055  | 1.000  |        |        |       |                     |       |       |                     |       |        |
| 11-10k   | 0.739  | 0.018  | 1.000  | 1.000  |        |       |                     |       |       |                     |       |        |
| 10-9k    | 1.000  | 1.000  | 0.999  | 0.286  | 0.137  |       |                     |       |       |                     |       |        |
| 8-7k     | 0.976  | 0.064  | 1.000  | 1.000  | 1.000  | 0.420 |                     |       |       |                     |       |        |
| 7-6k     | 0.759  | 0.005  | 1.000  | 1.000  | 1.000  | 0.067 | 1.000               |       |       |                     |       |        |
| 6-5k     | 0.595  | 0.005  | 1.000  | 1.000  | 1.000  | 0.051 | 1.000               | 1.000 |       |                     |       |        |
| 4-3k     | 0.855  | 0.007  | 1.000  | 1.000  | 1.000  | 0.098 | 1.000               | 1.000 | 1.000 |                     |       |        |
| 2-1k     | 0.999  | 0.098  | 1.000  | 1.000  | 0.998  | 0.631 | 1.000               | 0.910 | 0.879 | 0.973               |       |        |
| 1k-200   | 1.000  | 0.163  | 1.000  | 1.000  | 0.989  | 0.782 | 1.000               | 0.777 | 0.762 | 0.885               | 1.000 |        |
| 200-pres | 0.333  | 0.000  | 1.000  | 1.000  | 1.000  | 0.004 | 0.997               | 1.000 | 1.000 | 0.999               | 0.004 | 0.002  |
|          |        |        |        |        |        |       | Significant p≤0.100 |       |       | Significant p≤0.050 |       |        |

**Table S11:** Southern Europe Body Mass Male significant differences - Hochberg GT2 Post-Hoc Test

|          | 45-30k | 30-20k | 15-11k | 11-10k | 10-9k | 9-8k  | 8-7k  | 7-6k  | 6-5k  | 4-3k                | 2-1k  | 1k-200              | 200-pres |
|----------|--------|--------|--------|--------|-------|-------|-------|-------|-------|---------------------|-------|---------------------|----------|
| 45-30k   |        |        |        |        |       |       |       |       |       |                     |       |                     |          |
| 30-20k   | 1.000  |        |        |        |       |       |       |       |       |                     |       |                     |          |
| 15-11k   | 1.000  | 0.798  |        |        |       |       |       |       |       |                     |       |                     |          |
| 11-10k   | 1.000  | 0.931  | 1.000  |        |       |       |       |       |       |                     |       |                     |          |
| 10-9k    | 1.000  | 1.000  | 1.000  | 1.000  |       |       |       |       |       |                     |       |                     |          |
| 9-8k     | 1.000  | 0.997  | 1.000  | 1.000  | 1.000 |       |       |       |       |                     |       |                     |          |
| 8-7k     | 0.972  | 0.022  | 0.921  | 0.993  | 0.010 | 1.000 |       |       |       |                     |       |                     |          |
| 7-6k     | 0.709  | 0.004  | 0.309  | 0.629  | 0.001 | 1.000 | 1.000 |       |       |                     |       |                     |          |
| 6-5k     | 0.860  | 0.008  | 0.553  | 0.858  | 0.002 | 1.000 | 1.000 | 1.000 |       |                     |       |                     |          |
| 4-3k     | 1.000  | 0.223  | 1.000  | 1.000  | 0.460 | 1.000 | 0.999 | 0.535 | 0.830 |                     |       |                     |          |
| 2-1k     | 1.000  | 0.315  | 1.000  | 1.000  | 0.600 | 1.000 | 0.564 | 0.073 | 0.156 | 1.000               |       |                     |          |
| 1k-200   | 1.000  | 0.994  | 1.000  | 1.000  | 1.000 | 1.000 | 0.000 | 0.000 | 0.000 | 0.050               | 0.010 |                     |          |
| 200-pres | 0.970  | 0.017  | 0.835  | 0.987  | 0.003 | 1.000 | 1.000 | 1.000 | 1.000 | 0.980               | 0.107 | 0.000               |          |
|          |        |        |        |        |       |       |       |       |       | Significant p≤0.100 |       | Significant p≤0.050 |          |

**Table S12:** Southern Europe Body Mass Female significant differences - Hochberg GT2 Post-Hoc Tests

|          | 30-20k | 20-15k | 15-11k | 11-10k | 10-9k | 8-7k  | 7-6k  | 6-5k  | 4-3k  | 2-1k                | 1k-200 | 200-pres            |
|----------|--------|--------|--------|--------|-------|-------|-------|-------|-------|---------------------|--------|---------------------|
| 30-20k   |        |        |        |        |       |       |       |       |       |                     |        |                     |
| 20-15k   | 1.000  |        |        |        |       |       |       |       |       |                     |        |                     |
| 15-11k   | 1.000  | 1.000  |        |        |       |       |       |       |       |                     |        |                     |
| 11-10k   | 1.000  | 1.000  | 1.000  |        |       |       |       |       |       |                     |        |                     |
| 10-9k    | 1.000  | 0.991  | 0.954  | 0.915  |       |       |       |       |       |                     |        |                     |
| 8-7k     | 0.123  | 1.000  | 1.000  | 0.999  | 0.020 |       |       |       |       |                     |        |                     |
| 7-6k     | 0.014  | 1.000  | 0.996  | 0.878  | 0.002 | 1.000 |       |       |       |                     |        |                     |
| 6-5k     | 0.016  | 1.000  | 0.986  | 0.820  | 0.002 | 1.000 | 1.000 |       |       |                     |        |                     |
| 4-3k     | 0.044  | 1.000  | 1.000  | 0.996  | 0.006 | 1.000 | 1.000 | 1.000 |       |                     |        |                     |
| 2-1k     | 0.249  | 1.000  | 1.000  | 1.000  | 0.039 | 1.000 | 0.846 | 0.892 | 0.999 |                     |        |                     |
| 1k-200   | 0.694  | 1.000  | 1.000  | 1.000  | 0.166 | 0.992 | 0.188 | 0.343 | 0.503 | 1.000               |        |                     |
| 200-pres | 0.004  | 1.000  | 0.974  | 0.645  | 0.001 | 1.000 | 1.000 | 1.000 | 1.000 | 0.118               | 0.004  |                     |
|          |        |        |        |        |       |       |       |       |       | Significant p≤0.100 |        | Significant p≤0.050 |

**Table S13:** Central Europe Stature Male significant differences - Hochberg GT2 Post-Hoc Tests

|          | 45-30k | 15-11k | 8-7k  | 6-5k  | 5-4k  | 4-3k                       | 3-2k  | 2-1k                       | 1k-200 | 200-pres |
|----------|--------|--------|-------|-------|-------|----------------------------|-------|----------------------------|--------|----------|
| 45-30k   |        |        |       |       |       |                            |       |                            |        |          |
| 15-11k   | 1.000  |        |       |       |       |                            |       |                            |        |          |
| 8-7k     | 0.019  | 1.000  |       |       |       |                            |       |                            |        |          |
| 6-5k     | 1.000  | 1.000  | 0.860 |       |       |                            |       |                            |        |          |
| 5-4k     | 1.000  | 1.000  | 0.001 | 1.000 |       |                            |       |                            |        |          |
| 4-3k     | 1.000  | 1.000  | 0.011 | 1.000 | 0.998 |                            |       |                            |        |          |
| 3-2k     | 0.992  | 1.000  | 0.072 | 1.000 | 0.743 | 1.000                      |       |                            |        |          |
| 2-1k     | 1.000  | 1.000  | 0.012 | 1.000 | 0.979 | 1.000                      | 1.000 |                            |        |          |
| 1k-200   | 1.000  | 1.000  | 0.000 | 1.000 | 1.000 | 0.808                      | 0.285 | 0.570                      |        |          |
| 200-pres | 1.000  | 0.993  | 0.000 | 0.999 | 0.997 | 0.373                      | 0.115 | 0.267                      | 1.000  |          |
|          |        |        |       |       |       | Significant $p \leq 0.100$ |       | Significant $p \leq 0.050$ |        |          |

**Table S14:** Central Europe Stature Female significant differences - Hochberg GT2 Post-Hoc Tests

|          | 45-30k | 8-7k  | 7-6k  | 5-4k  | 4-3k  | 3-2k                       | 2-1k  | 1k-200                     | 200-pres |
|----------|--------|-------|-------|-------|-------|----------------------------|-------|----------------------------|----------|
| 45-30k   |        |       |       |       |       |                            |       |                            |          |
| 8-7k     | 0.960  |       |       |       |       |                            |       |                            |          |
| 7-6k     | 1.000  | 1.000 |       |       |       |                            |       |                            |          |
| 5-4k     | 1.000  | 0.485 | 1.000 |       |       |                            |       |                            |          |
| 4-3k     | 1.000  | 0.420 | 1.000 | 1.000 |       |                            |       |                            |          |
| 3-2k     | 1.000  | 0.995 | 1.000 | 1.000 | 1.000 |                            |       |                            |          |
| 2-1k     | 1.000  | 0.167 | 1.000 | 1.000 | 1.000 | 0.967                      |       |                            |          |
| 1k-200   | 1.000  | 0.060 | 0.999 | 0.998 | 0.986 | 0.662                      | 1.000 |                            |          |
| 200-pres | 1.000  | 0.062 | 0.956 | 0.943 | 0.921 | 0.553                      | 0.995 | 1.000                      |          |
|          |        |       |       |       |       | Significant $p \leq 0.100$ |       | Significant $p \leq 0.050$ |          |

**Table S15:** Central Europe Body Mass Male significant differences - Hochberg GT2 Post-Hoc Tests

|          | 45-30k | 15-11k | 8-7k  | 6-5k  | 5-4k  | 4-3k                       | 3-2k  | 2-1k                       | 1k-200 | 200-pres |
|----------|--------|--------|-------|-------|-------|----------------------------|-------|----------------------------|--------|----------|
| 45-30k   |        |        |       |       |       |                            |       |                            |        |          |
| 15-11k   | 1.000  |        |       |       |       |                            |       |                            |        |          |
| 8-7k     | 1.000  | 1.000  |       |       |       |                            |       |                            |        |          |
| 6-5k     | 1.000  | 1.000  | 1.000 |       |       |                            |       |                            |        |          |
| 5-4k     | 1.000  | 1.000  | 0.814 | 0.998 |       |                            |       |                            |        |          |
| 4-3k     | 1.000  | 1.000  | 1.000 | 1.000 | 0.781 |                            |       |                            |        |          |
| 3-2k     | 1.000  | 1.000  | 0.327 | 0.915 | 1.000 | 0.088                      |       |                            |        |          |
| 2-1k     | 1.000  | 1.000  | 0.329 | 0.932 | 1.000 | 0.025                      | 1.000 |                            |        |          |
| 1k-200   | 1.000  | 1.000  | 0.518 | 0.977 | 1.000 | 0.150                      | 1.000 | 1.000                      |        |          |
| 200-pres | 1.000  | 1.000  | 0.991 | 1.000 | 1.000 | 1.000                      | 1.000 | 1.000                      | 1.000  |          |
|          |        |        |       |       |       | Significant $p \leq 0.100$ |       | Significant $p \leq 0.050$ |        |          |

**Table S16:** Southern Europe Body Mass Female significant differences - Hochberg GT2 Post-Hoc Tests

|          | 45-30k | 8-7k  | 7-6k  | 5-4k  | 4-3k  | 3-2k                       | 2-1k  | 1k-200                     | 200-pres |
|----------|--------|-------|-------|-------|-------|----------------------------|-------|----------------------------|----------|
| 45-30k   |        |       |       |       |       |                            |       |                            |          |
| 8-7k     | 0.424  |       |       |       |       |                            |       |                            |          |
| 7-6k     | 1.000  | 0.999 |       |       |       |                            |       |                            |          |
| 5-4k     | 0.888  | 0.998 | 1.000 |       |       |                            |       |                            |          |
| 4-3k     | 0.405  | 1.000 | 1.000 | 0.955 |       |                            |       |                            |          |
| 3-2k     | 0.994  | 0.961 | 1.000 | 1.000 | 0.823 |                            |       |                            |          |
| 2-1k     | 0.986  | 0.856 | 1.000 | 1.000 | 0.075 | 1.000                      |       |                            |          |
| 1k-200   | 1.000  | 0.365 | 1.000 | 0.704 | 0.001 | 1.000                      | 1.000 |                            |          |
| 200-pres | 1.000  | 0.990 | 1.000 | 1.000 | 0.993 | 1.000                      | 1.000 | 1.000                      |          |
|          |        |       |       |       |       | Significant $p \leq 0.100$ |       | Significant $p \leq 0.050$ |          |

**Table S17:** Northern Europe Stature Male significant differences - Hochberg GT2 Post-Hoc Tests

|          | 8-7k  | 7-6k  | 6-5k  | 5-4k                       | 4-3k  | 3-2k  | 2-1k                       | 1k-200 | 200-pres |
|----------|-------|-------|-------|----------------------------|-------|-------|----------------------------|--------|----------|
| 8-7k     |       |       |       |                            |       |       |                            |        |          |
| 7-6k     | 1.000 |       |       |                            |       |       |                            |        |          |
| 6-5k     | 0.646 | 0.810 |       |                            |       |       |                            |        |          |
| 5-4k     | 0.143 | 0.019 | 0.999 |                            |       |       |                            |        |          |
| 4-3k     | 0.000 | 0.000 | 0.001 | 0.003                      |       |       |                            |        |          |
| 3-2k     | 0.338 | 0.231 | 1.000 | 1.000                      | 0.002 |       |                            |        |          |
| 2-1k     | 0.004 | 0.000 | 0.008 | 0.045                      | 0.188 | 0.032 |                            |        |          |
| 1k-200   | 0.009 | 0.000 | 0.028 | 0.153                      | 0.071 | 0.106 | 1.000                      |        |          |
| 200-pres | 0.030 | 0.001 | 0.469 | 0.996                      | 0.046 | 0.887 | 0.999                      | 1.000  |          |
|          |       |       |       | Significant $p \leq 0.100$ |       |       | Significant $p \leq 0.050$ |        |          |

**Table S18:** Northern Europe Stature Female significant differences - Hochberg GT2 Post-Hoc Tests

|          | 8-7k  | 7-6k  | 6-5k  | 5-4k                       | 4-3k  | 3-2k  | 2-1k                       | 1k-200 | 200-pres |
|----------|-------|-------|-------|----------------------------|-------|-------|----------------------------|--------|----------|
| 8-7k     |       |       |       |                            |       |       |                            |        |          |
| 7-6k     | 1.000 |       |       |                            |       |       |                            |        |          |
| 6-5k     | 1.000 | 1.000 |       |                            |       |       |                            |        |          |
| 5-4k     | 1.000 | 1.000 | 1.000 |                            |       |       |                            |        |          |
| 4-3k     | 0.694 | 0.724 | 0.996 | 0.783                      |       |       |                            |        |          |
| 3-2k     | 0.996 | 0.999 | 1.000 | 1.000                      | 0.999 |       |                            |        |          |
| 2-1k     | 0.561 | 0.361 | 0.979 | 0.047                      | 1.000 | 0.965 |                            |        |          |
| 1k-200   | 0.978 | 0.976 | 1.000 | 0.881                      | 0.999 | 1.000 | 0.587                      |        |          |
| 200-pres | 0.999 | 1.000 | 1.000 | 1.000                      | 0.998 | 1.000 | 0.975                      | 1.000  |          |
|          |       |       |       | Significant $p \leq 0.100$ |       |       | Significant $p \leq 0.050$ |        |          |

**Table S19:** Northern Europe Body Mass Male significant differences - Hochberg GT2 Post-Hoc Tests

|          | 8-7k  | 7-6k  | 6-5k  | 5-4k                       | 4-3k  | 3-2k  | 2-1k                       | 1k-200 | 200-pres |
|----------|-------|-------|-------|----------------------------|-------|-------|----------------------------|--------|----------|
| 8-7k     |       |       |       |                            |       |       |                            |        |          |
| 7-6k     | 1.000 |       |       |                            |       |       |                            |        |          |
| 6-5k     | 1.000 | 1.000 |       |                            |       |       |                            |        |          |
| 5-4k     | 1.000 | 1.000 | 1.000 |                            |       |       |                            |        |          |
| 4-3k     | 0.460 | 0.637 | 0.196 | 0.116                      |       |       |                            |        |          |
| 3-2k     | 0.998 | 1.000 | 0.919 | 0.548                      | 0.941 |       |                            |        |          |
| 2-1k     | 0.715 | 0.677 | 0.014 | 0.000                      | 1.000 | 0.989 |                            |        |          |
| 1k-200   | 0.944 | 0.988 | 0.112 | 0.001                      | 0.988 | 1.000 | 0.998                      |        |          |
| 200-pres | 0.999 | 1.000 | 0.957 | 0.590                      | 0.869 | 1.000 | 0.817                      | 1.000  |          |
|          |       |       |       | Significant $p \leq 0.100$ |       |       | Significant $p \leq 0.050$ |        |          |

**Table S20:** Northern Europe Body Mass Female significant differences - Hochberg GT2 Post-Hoc Tests

|          | 8-7k  | 7-6k  | 6-5k  | 5-4k                       | 4-3k  | 3-2k  | 2-1k                       | 1k-200 | 200-pres |
|----------|-------|-------|-------|----------------------------|-------|-------|----------------------------|--------|----------|
| 8-7k     |       |       |       |                            |       |       |                            |        |          |
| 7-6k     | 0.855 |       |       |                            |       |       |                            |        |          |
| 6-5k     | 1.000 | 0.781 |       |                            |       |       |                            |        |          |
| 5-4k     | 1.000 | 0.128 | 1.000 |                            |       |       |                            |        |          |
| 4-3k     | 1.000 | 0.996 | 1.000 | 1.000                      |       |       |                            |        |          |
| 3-2k     | 1.000 | 0.431 | 1.000 | 1.000                      | 1.000 |       |                            |        |          |
| 2-1k     | 1.000 | 0.999 | 0.999 | 0.081                      | 1.000 | 0.718 |                            |        |          |
| 1k-200   | 1.000 | 0.203 | 1.000 | 1.000                      | 1.000 | 1.000 | 0.024                      |        |          |
| 200-pres | 1.000 | 0.906 | 1.000 | 0.998                      | 1.000 | 1.000 | 1.000                      | 1.000  |          |
|          |       |       |       | Significant $p \leq 0.100$ |       |       | Significant $p \leq 0.050$ |        |          |

**Table S21: Nile Valley Stature Male significant differences - Hochberg GT2 Post-Hoc Tests**

|        | 15-11k                     | 7-6k  | 6-5k  | 5-4k                       | 4-3k  | 3-2k |
|--------|----------------------------|-------|-------|----------------------------|-------|------|
| 15-11k |                            |       |       |                            |       |      |
| 7-6k   | 1.000                      |       |       |                            |       |      |
| 6-5k   | 0.741                      | 1.000 |       |                            |       |      |
| 5-4k   | 1.000                      | 1.000 | 0.695 |                            |       |      |
| 4-3k   | 0.967                      | 0.896 | 0.020 | 1.000                      |       |      |
| 3-2k   | 0.993                      | 1.000 | 1.000 | 0.978                      | 0.531 |      |
|        | Significant $p \leq 0.100$ |       |       | Significant $p \leq 0.050$ |       |      |

**Table S22: Nile Valley Stature Female significant differences - Hochberg GT2 Post-Hoc Tests**

|        | 15-11k                     | 7-6k  | 6-5k  | 4-3k                       | 3-2k |
|--------|----------------------------|-------|-------|----------------------------|------|
| 15-11k |                            |       |       |                            |      |
| 7-6k   | 1.000                      |       |       |                            |      |
| 6-5k   | 1.000                      | 1.000 |       |                            |      |
| 4-3k   | 1.000                      | 1.000 | 1.000 |                            |      |
| 3-2k   | 0.846                      | 0.980 | 0.920 | 0.878                      |      |
|        | Significant $p \leq 0.100$ |       |       | Significant $p \leq 0.050$ |      |

**Table S23: Nile Valley Body Mass Male significant differences - Hochberg GT2 Post-Hoc Tests**

|        | 15-11k                     | 7-6k  | 6-5k  | 5-4k                       | 4-3k  | 3-2k |
|--------|----------------------------|-------|-------|----------------------------|-------|------|
| 15-11k |                            |       |       |                            |       |      |
| 7-6k   | 1.000                      |       |       |                            |       |      |
| 6-5k   | 0.996                      | 1.000 |       |                            |       |      |
| 5-4k   | 0.558                      | 0.952 | 0.944 |                            |       |      |
| 4-3k   | 1.000                      | 0.994 | 0.857 | 0.120                      |       |      |
| 3-2k   | 0.909                      | 0.999 | 1.000 | 1.000                      | 0.667 |      |
|        | Significant $p \leq 0.100$ |       |       | Significant $p \leq 0.050$ |       |      |

**Table S24: Nile Valley Body Mass Female significant differences - Hochberg GT2 Post-Hoc Tests**

|      | 7-6k                       | 6-5k  | 4-3k                       | 3-2k |
|------|----------------------------|-------|----------------------------|------|
| 7-6k |                            |       |                            |      |
| 6-5k | 0.452                      |       |                            |      |
| 4-3k | 0.999                      | 0.458 |                            |      |
| 3-2k | 0.629                      | 0.994 | 0.725                      |      |
|      | Significant $p \leq 0.100$ |       | Significant $p \leq 0.050$ |      |



**Table S25: South Asia Stature Male significant differences - Hochberg GT2 Post-Hoc Tests**

|         | 11-10k | 9-8k  | 7-6k                | 5-4k  | 4-3k  | 3-2k                | 1k-200 | 200-pre |
|---------|--------|-------|---------------------|-------|-------|---------------------|--------|---------|
| 11-10k  |        |       |                     |       |       |                     |        |         |
| 9-8k    | 1.000  |       |                     |       |       |                     |        |         |
| 7-6k    | 1.000  | 0.994 |                     |       |       |                     |        |         |
| 5-4k    | 1.000  | 0.885 | 1.000               |       |       |                     |        |         |
| 4-3k    | 0.654  | 0.002 | 0.243               | 0.186 |       |                     |        |         |
| 3-2k    | 0.961  | 0.081 | 0.862               | 0.891 | 1.000 |                     |        |         |
| 1k-200  | 0.377  | 0.002 | 0.126               | 0.106 | 1.000 | 1.000               |        |         |
| 200-pre | 0.004  | 0.000 | 0.000               | 0.000 | 0.105 | 0.333               | 0.987  |         |
|         |        |       | Significant p≤0.100 |       |       | Significant p≤0.050 |        |         |

**Table S26: South Asia Stature Female significant differences - Hochberg GT2 Post-Hoc Tests**

|          | 11-10k | 9-8k  | 7-6k                | 5-4k  | 4-3k                | 1k-200 | 200-pres |
|----------|--------|-------|---------------------|-------|---------------------|--------|----------|
| 11-10k   |        |       |                     |       |                     |        |          |
| 9-8k     | 1.000  |       |                     |       |                     |        |          |
| 7-6k     | 1.000  | 1.000 |                     |       |                     |        |          |
| 5-4k     | 1.000  | 1.000 | 1.000               |       |                     |        |          |
| 4-3k     | 1.000  | 0.997 | 1.000               | 1.000 |                     |        |          |
| 1k-200   | 0.988  | 0.890 | 0.996               | 1.000 | 1.000               |        |          |
| 200-pres | 0.494  | 0.109 | 0.593               | 0.709 | 0.239               | 0.983  |          |
|          |        |       | Significant p≤0.100 |       | Significant p≤0.050 |        |          |

**Table S27: South Asia Body Mass Male significant differences - Hochberg GT2 Post-Hoc Tests**

|             | 9-8k  | 5-4k  | 4-3k                | 3-2k  | 1k-200              | 200-present |
|-------------|-------|-------|---------------------|-------|---------------------|-------------|
| 9-8k        |       |       |                     |       |                     |             |
| 5-4k        | 1.000 |       |                     |       |                     |             |
| 4-3k        | 0.509 | 0.091 |                     |       |                     |             |
| 3-2k        | 0.898 | 0.604 | 1.000               |       |                     |             |
| 1k-200      | 0.934 | 0.666 | 1.000               | 1.000 |                     |             |
| 200-present | 0.080 | 0.001 | 0.962               | 0.932 | 0.743               |             |
|             |       |       | Significant p≤0.100 |       | Significant p≤0.050 |             |

**Table S28: South Asia Body Mass Female significant differences - Hochberg GT2 Post-Hoc Tests**

|             | 30-20k | 15-11k | 11-10k              | 10-9k | 8-7k                |
|-------------|--------|--------|---------------------|-------|---------------------|
| 30-20k      |        |        |                     |       |                     |
| 5-4k        | 0.200  |        |                     |       |                     |
| 4-3k        | 0.101  | 1.000  |                     |       |                     |
| 1k-200      | 0.922  | 0.737  | 0.512               |       |                     |
| 200-present | 0.014  | 0.994  | 0.868               | 0.064 |                     |
|             |        |        | Significant p≤0.100 |       | Significant p≤0.050 |

**Table S29: China Stature Male significant differences - Hochberg GT2 Post-Hoc Tests**

|          | 8-7k  | 7-6k  | 6-5k  | 5-4k                | 4-3k  | 3-2k  | 2-1k                | 1k-200 | 200-pres |
|----------|-------|-------|-------|---------------------|-------|-------|---------------------|--------|----------|
| 8-7k     |       |       |       |                     |       |       |                     |        |          |
| 7-6k     | 1.000 |       |       |                     |       |       |                     |        |          |
| 6-5k     | 1.000 | 1.000 |       |                     |       |       |                     |        |          |
| 5-4k     | 0.375 | 0.794 | 0.979 |                     |       |       |                     |        |          |
| 4-3k     | 1.000 | 1.000 | 1.000 | 0.230               |       |       |                     |        |          |
| 3-2k     | 1.000 | 1.000 | 1.000 | 0.397               | 1.000 |       |                     |        |          |
| 2-1k     | 1.000 | 1.000 | 1.000 | 0.857               | 0.979 | 1.000 |                     |        |          |
| 1k-200   | 0.986 | 1.000 | 1.000 | 0.928               | 0.885 | 0.989 | 1.000               |        |          |
| 200-pres | 0.997 | 1.000 | 1.000 | 0.937               | 0.940 | 0.998 | 1.000               | 1.000  |          |
|          |       |       |       | Significant p≤0.100 |       |       | Significant p≤0.050 |        |          |

**Table S30: China Stature Female significant differences - Hochberg GT2 Post-Hoc Tests**

|        | 8-7k                | 6-5k  | 4-3k  | 3-2k                | 2-1k  | 1k-200 |
|--------|---------------------|-------|-------|---------------------|-------|--------|
| 8-7k   |                     |       |       |                     |       |        |
| 6-5k   | 1.000               |       |       |                     |       |        |
| 4-3k   | 0.999               | 1.000 |       |                     |       |        |
| 3-2k   | 0.362               | 1.000 | 0.990 |                     |       |        |
| 2-1k   | 0.398               | 1.000 | 0.998 | 1.000               |       |        |
| 1k-200 | 0.000               | 0.523 | 0.012 | 0.164               | 0.021 |        |
|        | Significant p≤0.100 |       |       | Significant p≤0.050 |       |        |

**Table S31: China Body Mass Male significant differences - Hochberg GT2 Post-Hoc Tests**

|          | 8-7k  | 7-6k  | 6-5k  | 5-4k                | 4-3k  | 3-2k  | 2-1k                | 1k-200 | 200-pres |
|----------|-------|-------|-------|---------------------|-------|-------|---------------------|--------|----------|
| 8-7k     |       |       |       |                     |       |       |                     |        |          |
| 7-6k     | 0.530 |       |       |                     |       |       |                     |        |          |
| 6-5k     | 1.000 | 0.990 |       |                     |       |       |                     |        |          |
| 5-4k     | 0.582 | 1.000 | 1.000 |                     |       |       |                     |        |          |
| 4-3k     | 0.076 | 0.018 | 0.254 | 0.005               |       |       |                     |        |          |
| 3-2k     | 0.004 | 0.010 | 0.121 | 0.002               | 1.000 |       |                     |        |          |
| 2-1k     | 0.001 | 0.010 | 0.116 | 0.001               | 1.000 | 1.000 |                     |        |          |
| 1k-200   | 0.868 | 0.115 | 0.923 | 0.060               | 0.885 | 0.243 | 0.136               |        |          |
| 200-pres | 1.000 | 0.439 | 1.000 | 0.444               | 0.077 | 0.002 | 0.001               | 0.893  |          |
|          |       |       |       | Significant p≤0.100 |       |       | Significant p≤0.050 |        |          |

**Table S32: China Body Mass Female significant differences - Hochberg GT2 Post-Hoc Tests**

|        | 8-7k                | 6-5k  | 4-3k  | 3-2k                | 2-1k  | 1k-200 |
|--------|---------------------|-------|-------|---------------------|-------|--------|
| 8-7k   |                     |       |       |                     |       |        |
| 6-5k   | 0.326               |       |       |                     |       |        |
| 4-3k   | 0.442               | 0.939 |       |                     |       |        |
| 3-2k   | 0.922               | 0.771 | 1.000 |                     |       |        |
| 2-1k   | 0.000               | 1.000 | 0.662 | 0.098               |       |        |
| 1k-200 | 0.673               | 0.830 | 1.000 | 1.000               | 0.112 |        |
|        | Significant p≤0.100 |       |       | Significant p≤0.050 |       |        |

**Figure 7:** Enlarged heatmap of spatio-temporal variation in stature throughout Holocene Europe. Red points denote site locations.

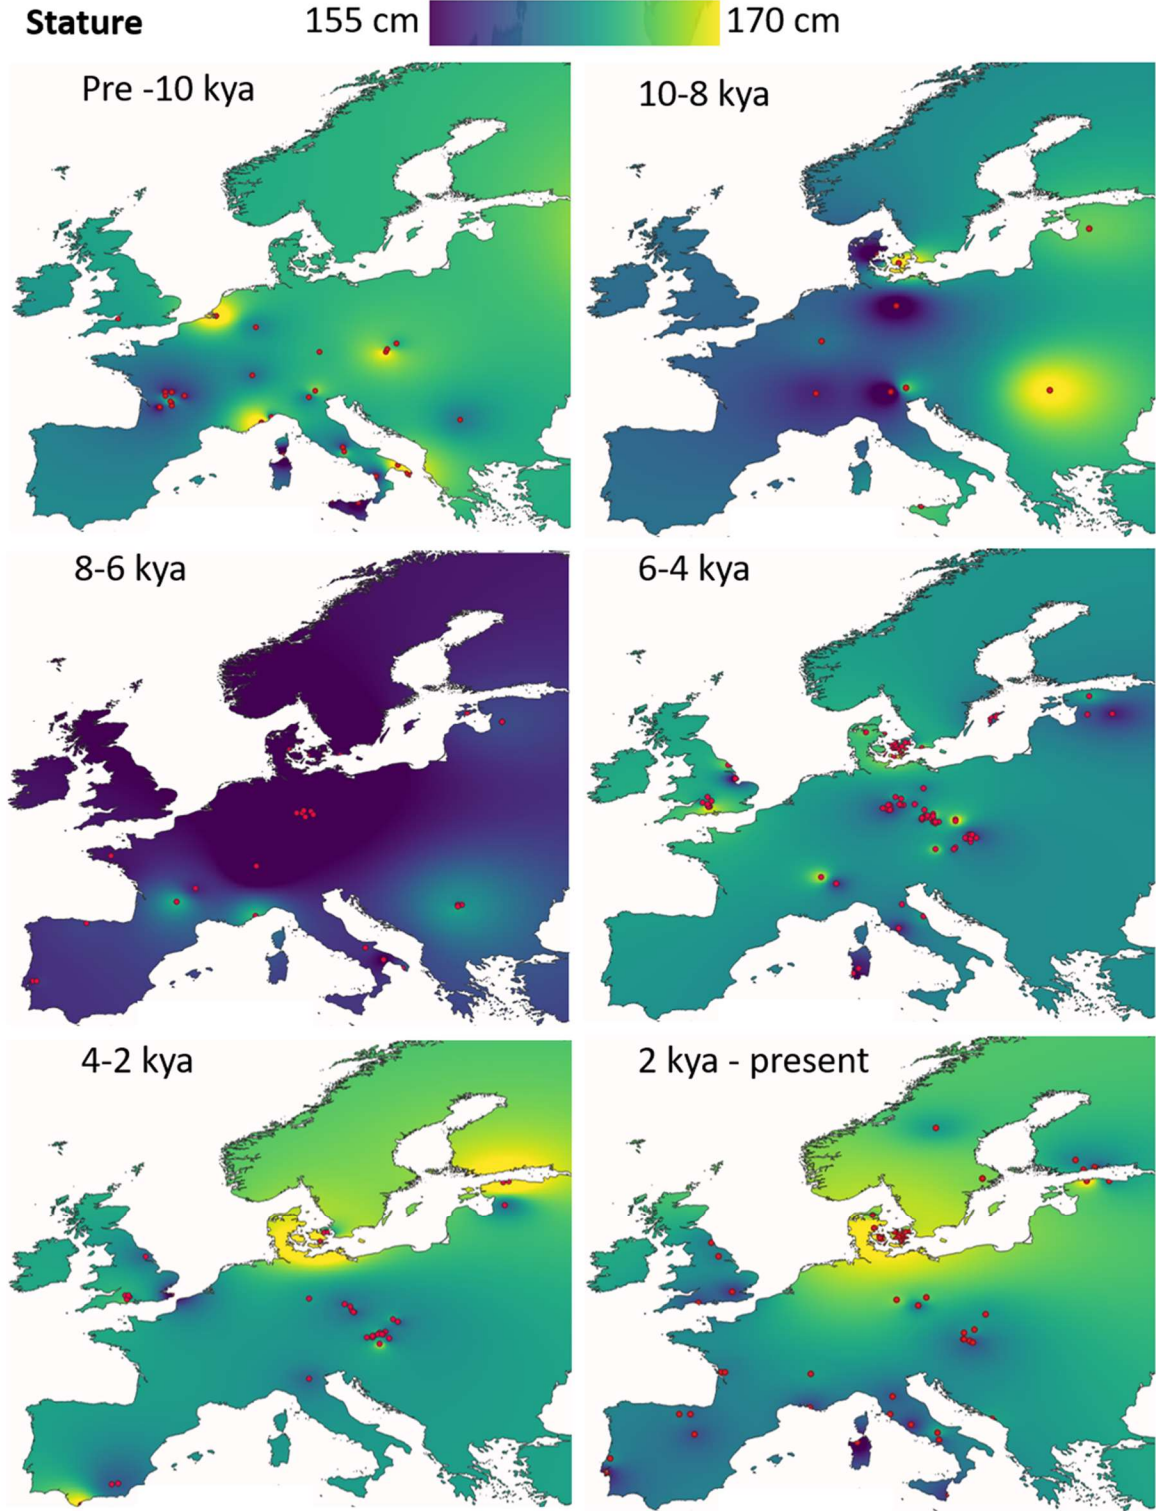

**Figure 8:** Enlarged heatmaps of spatio-temporal variation in body mass throughout Holocene Europe. Red points denote site locations.

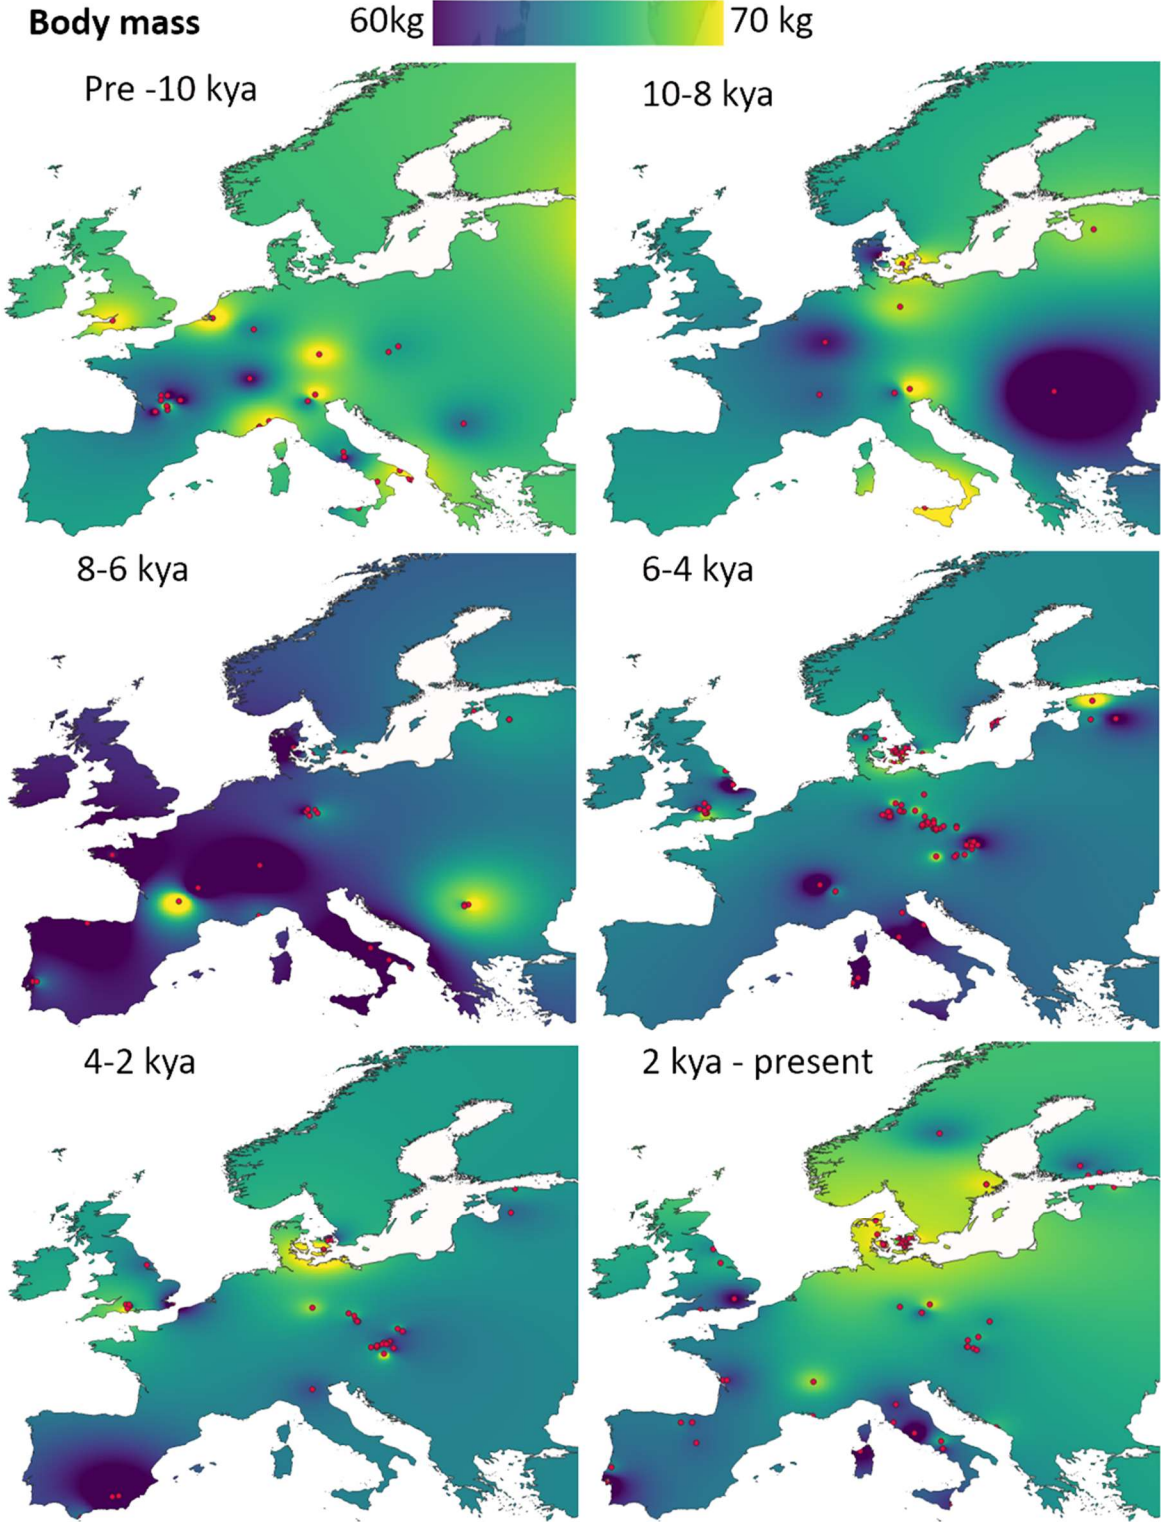

**Figure S9:** Heatmaps for European female stature variation in 2kya temporal bands.

Stature

150 cm

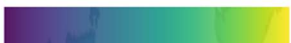

160 cm

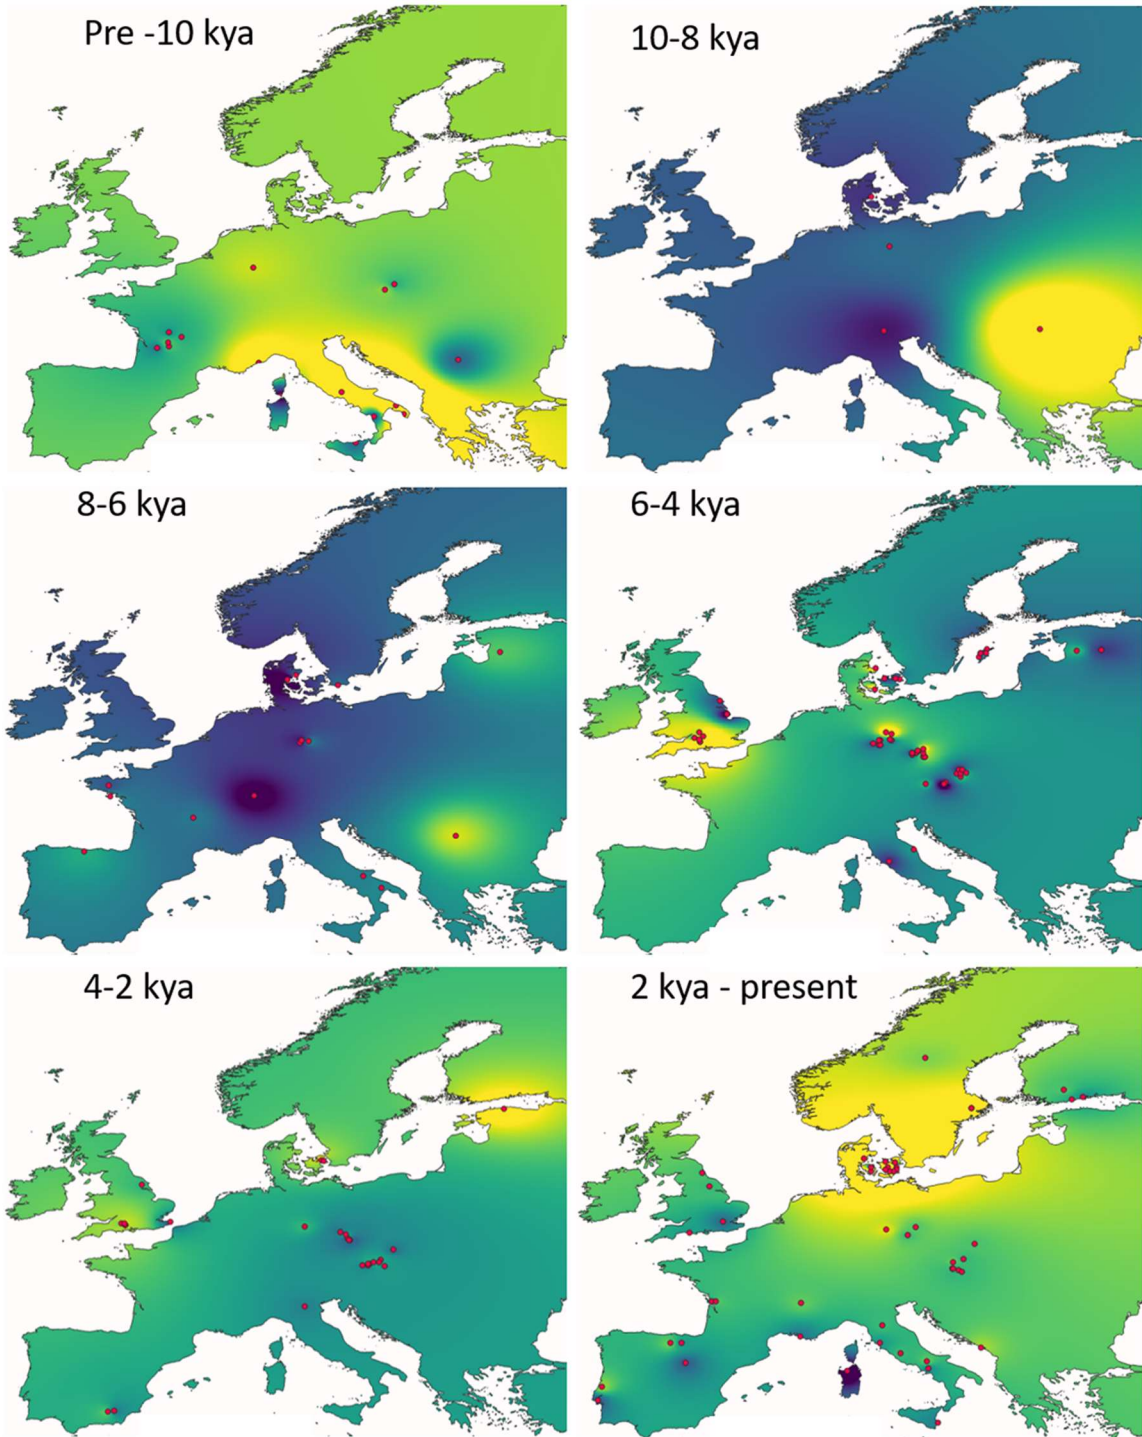

Figure S10: Heatmaps for European female body mass variation in 2kya temporal bands.

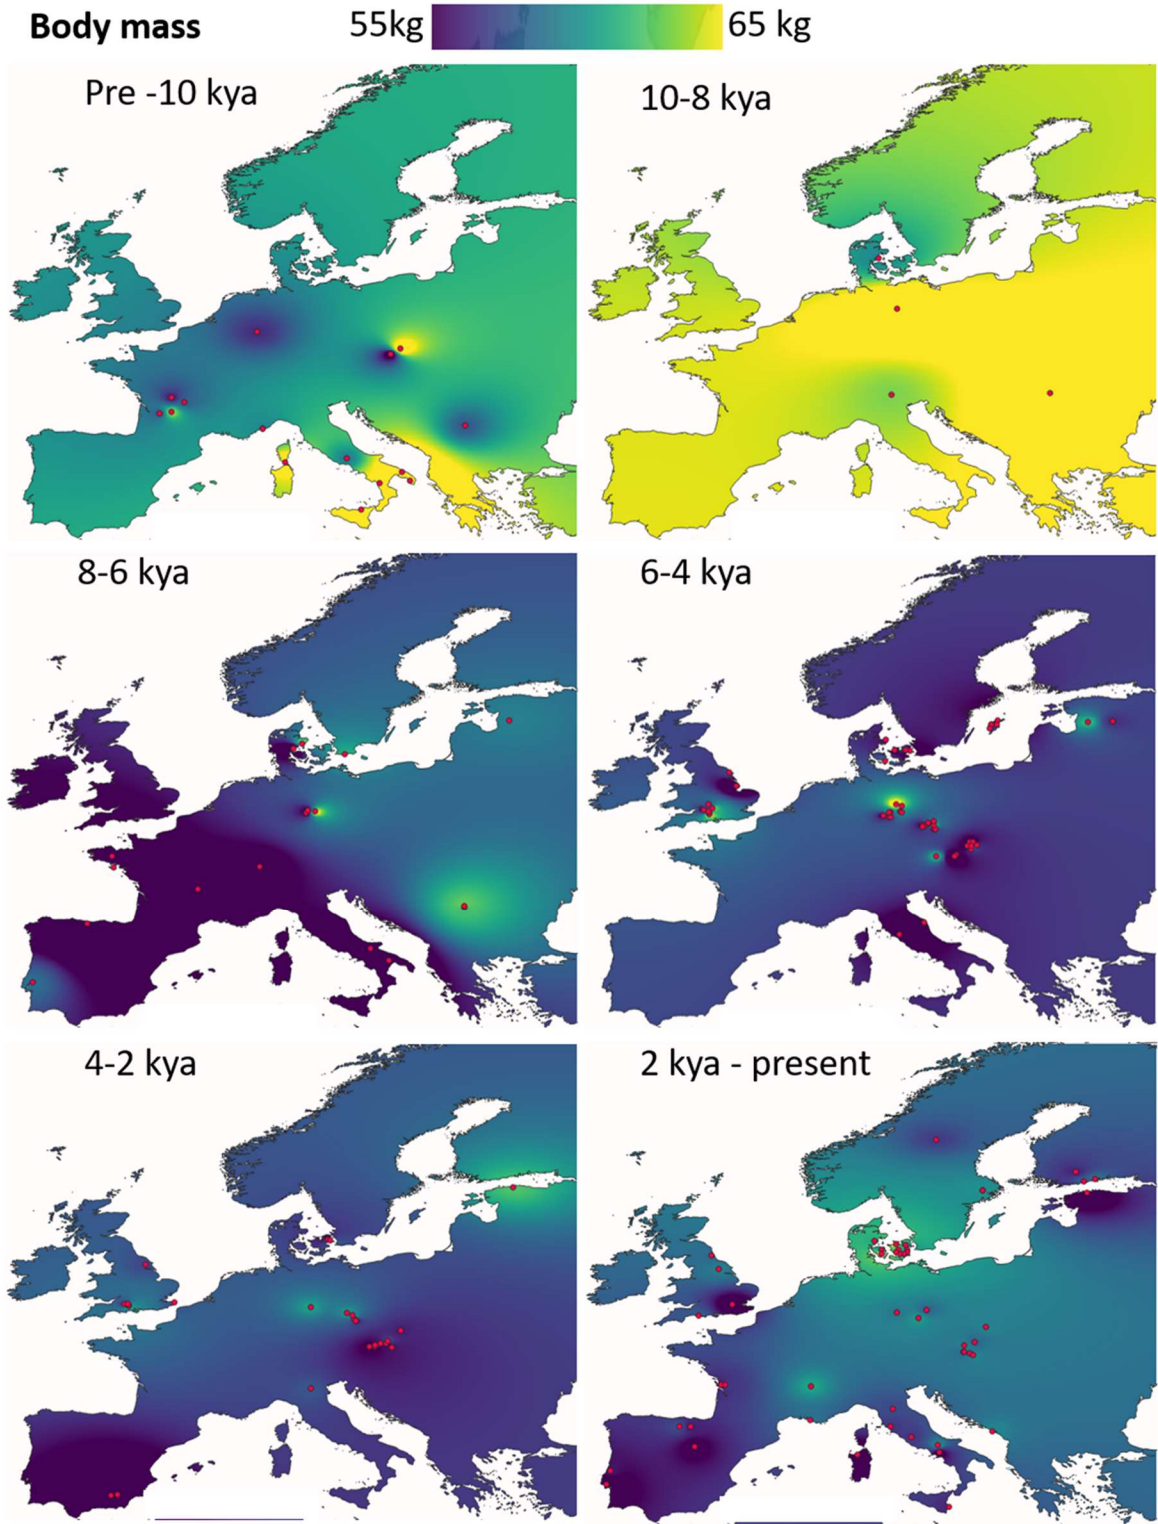

Figure S11: Heatmaps for European male stature variation in 2kya temporal bands.

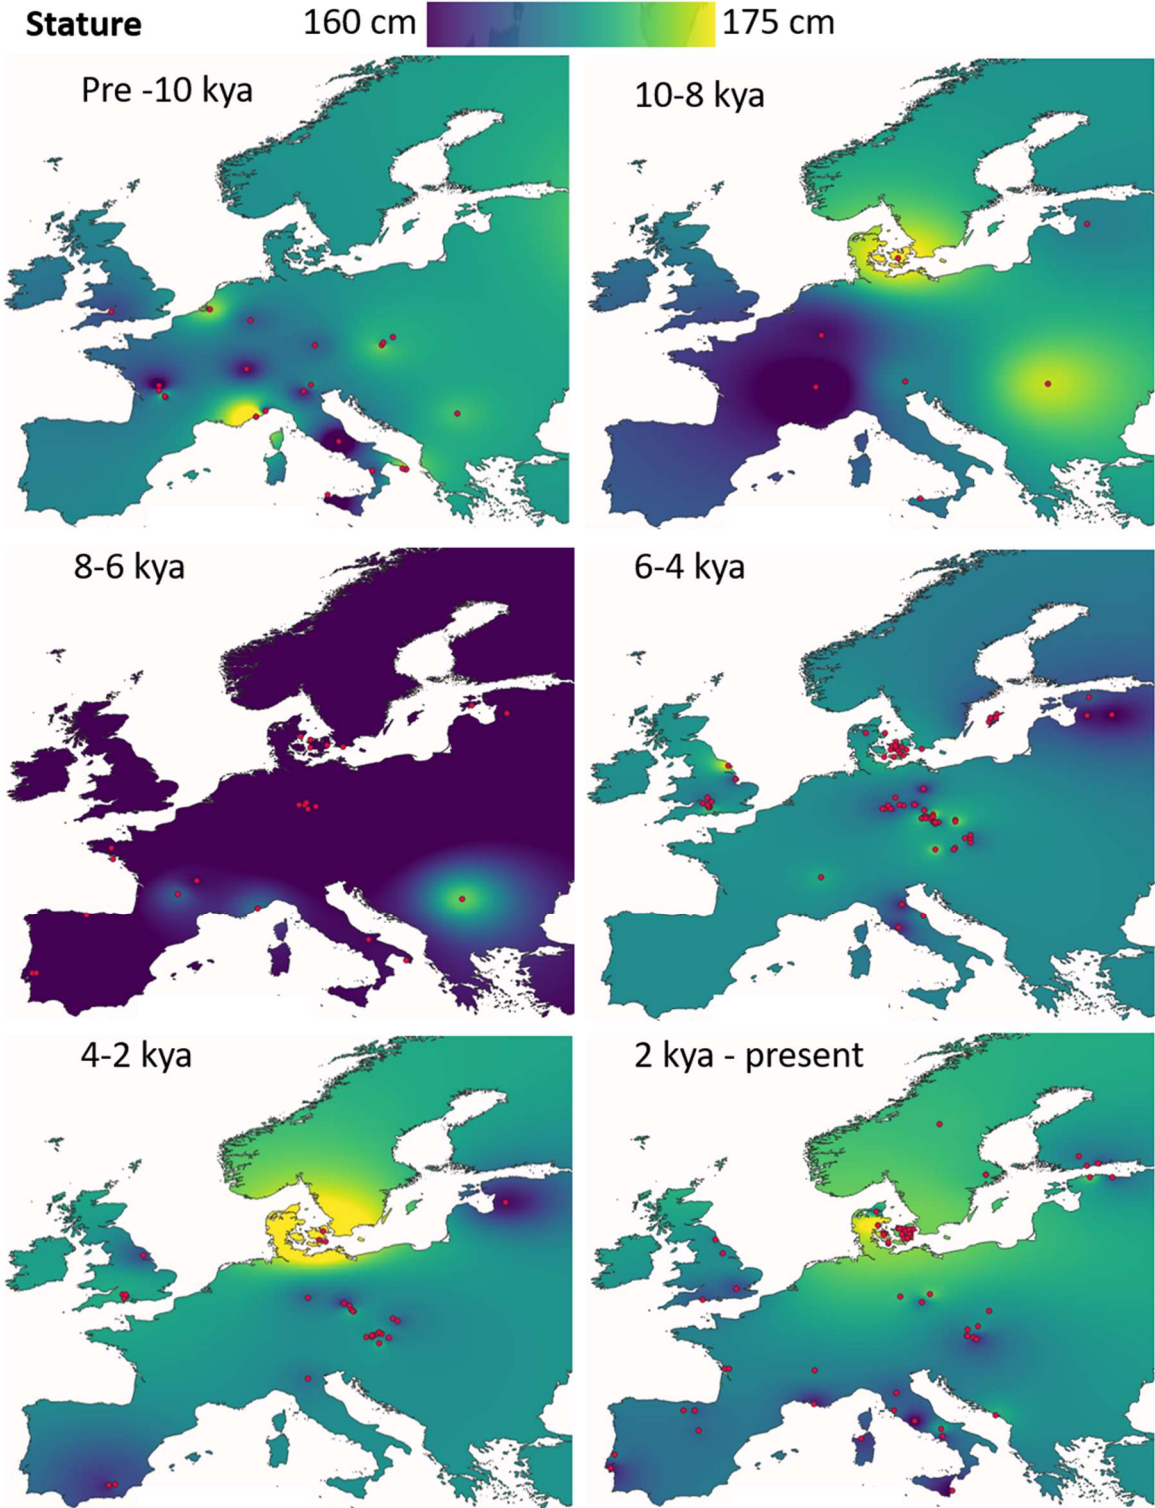

Figure S12: Heatmaps for European male body mass variation in 2kya temporal bands.

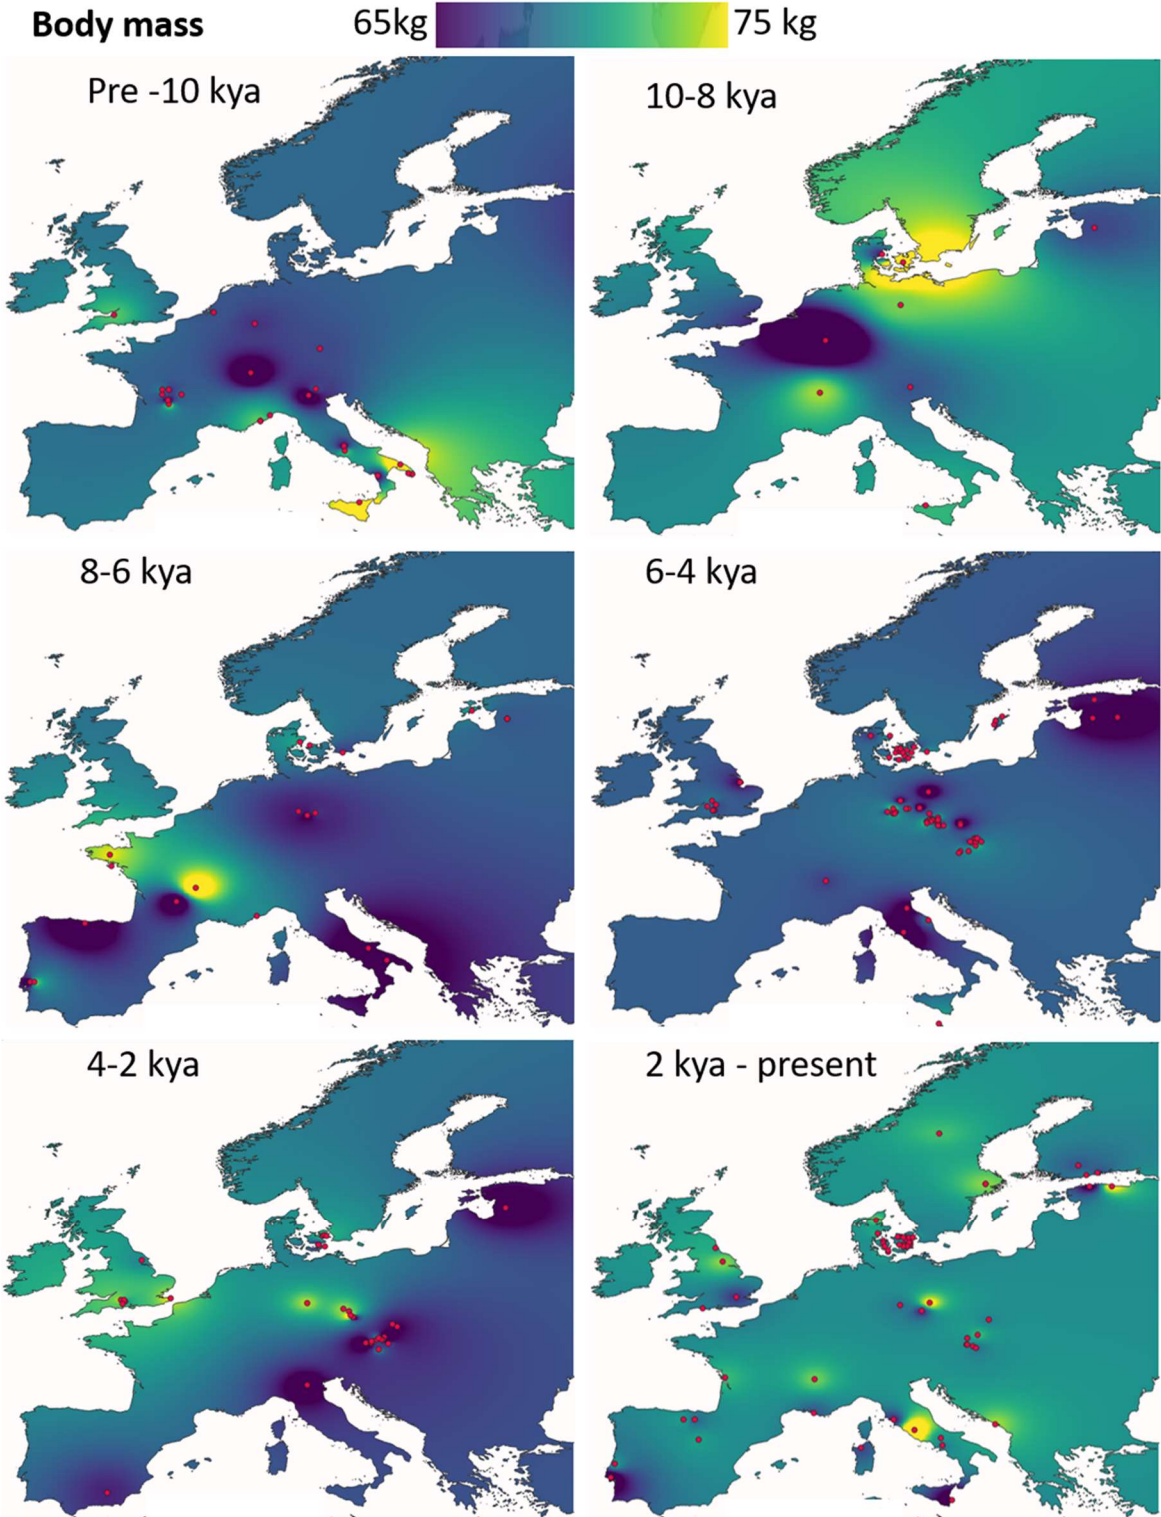



## Supplementary References

1. C. B. Ruff, *Skeletal Variation and Adaptation in Europeans: Upper Paleolithic to the Twentieth Century* (Wiley Blackwell, 2017) <https://doi.org/10.1002/9781118628430> (September 10, 2022).
2. C. B. Ruff, *et al.*, Gradual decline in mobility with the adoption of food production in Europe. *Proc. Natl. Acad. Sci.* **112**, 7147–7152 (2015).
3. J. T. Stock, *et al.*, *Body Size, Skeletal Biomechanics, Mobility and Habitual Activity from the Late Palaeolithic to the Mid-Dynastic Nile Valley* (2011) <https://doi.org/10.1002/9780470670170.ch14>.
4. E. Pomeroy, V. Mushrif-Tripathy, T. J. Cole, J. C. K. Wells, J. T. Stock, Ancient origins of low lean mass among South Asians and implications for modern type 2 diabetes susceptibility. *Sci. Rep.* **9** (2019).
5. L. Segurel, *et al.*, Why and when was lactase persistence selected for? Insights from Central Asian herders and ancient DNA. *PLOS Biol.* **18**, e3000742 (2020).
6. S. A. Tishkoff, *et al.*, Convergent adaptation of human lactase persistence in Africa and Europe. *Nat. Genet.* **2006 391 39**, 31–40 (2006).
7. A. Ranciaro, *et al.*, Genetic Origins of Lactase Persistence and the Spread of Pastoralism in Africa. *Am. J. Hum. Genet.* **94**, 496–510 (2014).
8. C. J. E. Ingram, *et al.*, A novel polymorphism associated with lactose tolerance in Africa: Multiple causes for lactase persistence? *Hum. Genet.* **120**, 779–788 (2007).
9. C. M. Schlebusch, P. Sjodin, P. Skoglund, M. Jakobsson, Stronger signal of recent selection for lactase persistence in Maasai than in Europeans. *Eur. J. Hum. Genet.* **2013 215 21**, 550–553 (2012).
10. M. Bleasdale, *et al.*, Ancient proteins provide evidence of dairy consumption in eastern Africa <https://doi.org/10.1038/s41467-020-20682-3>.
11. E. Priehodová, *et al.*, Sahelian pastoralism from the perspective of variants associated with lactase persistence. *Am. J. Phys. Anthropol.* **173**, 423–436 (2020).
12. B. J. Adams, J. E. Byrd, Interobserver Variation of Selected Postcranial Skeletal Measurements. *J. Forensic Sci.* **47**, 15550J (2002).
13. N. R. Langley, *et al.*, Error quantification of osteometric data in forensic anthropology. *Forensic Sci. Int.* **287**, 183–189 (2018).
14. S. Inskip, *et al.*, Evaluating macroscopic sex estimation methods using genetically sexed archaeological material: The medieval skeletal collection from St John’s Divinity School, Cambridge. *Am. J. Phys. Anthropol.* **168**, 340–351 (2019).
15. C. Malone, S. Stoddart, “Figurines of Malta” in *The Oxford Handbook of Prehistoric Figurines*, T. Insoll, Ed. (Oxford University Press, 2016), pp. 729–53.
16. E. W. Parkinson, J. T. Stock, “Physical activity and body size in Temple Period Malta: biomechanical analysis of commingled and fragmentary long bones” in *Temple People: Bioarchaeology, Resilience and Culture in Prehistoric Malta*, S. Stoddart, C. Malone, Eds. (McDonald Institute for Archaeological Research, 2022), pp. 183–94.
17. R. Power, *et al.*, “General pathology in the Circle: biocultural insights into population health, trauma and care in Neolithic Malta” in *Temple People: Bioarchaeology, Resilience and Culture in Prehistoric Malta*, S. Stoddart, C. Malone, Eds. (McDonald Institute for Archaeological Research, 2022), pp. 195–286.
18. R. McLaughlin, *et al.*, “An isotopic study of palaeodiet at the Circle and the Xemxija tombs” in *Temple People: Bioarchaeology, Resilience and Culture in Prehistoric Malta.*, S. Stoddart, C. Malone, Eds. (McDonald Institute for Archaeological Research, 2022), pp. 298–302.
19. C. D. Spiteri, *et al.*, Regional asynchronicity in dairy production and processing in early farming communities of the northern Mediterranean. *Proc. Natl. Acad. Sci. U. S. A.* **113**, 13594–13599 (2016).

20. R. McLaughlin, "Economy, environment and resources in prehistoric Malta" in *Temple Places: Excavating Cultural Sustainability in Prehistoric Malta*, C. Malone, E. Al., Eds. (McDonald Institute for Archaeological Research, 2020), pp. 281–308.
21. R Core Team, R: A language and environment for statistical computing (2021).
22. R Studio Team, RStudio: Integrated Development for R (2020).
23. H. Wickham, *ggplot2: Elegant Graphics for Data Analysis* (Springer-Verlag, 2016).
24. H. Wickham, D. Seidel, scales: Scale Functions for Visualization (2020).
25. E. J. Pebesma, R. S. Bivand, Classes and methods for spatial data in R (2005).
26. R. S. Bivand, T. Keitt, B. Rowlingson, rgdal: Bindings for the "Geospatial" Data Abstraction Library (2021).
27. R. J. Hijmans, raster: Geographic Data Analysis and Modeling (2020).
28. H. Wickham, R. François, L. Henry, K. Müller, dplyr: A Grammar of Data Manipulation (2021).
29. H. Akima, A. Gebhardt, akima: Interpolation of Irregularly and Regularly Spaced Data (2020).
30. M. Tennekes, tmap: Thematic Maps in R. *J. Stat. Softw.* **84**, 1–39 (2018).
31. S. Rochette, Response to Interpolation of geodata on surface of a sphere. (2017) (June 12, 2022).
32. QGIS.org, QGIS Geographic Information System (2022).
33. M. H. Raxter, *et al.*, Stature estimation in ancient Egyptians: A new technique based on anatomical reconstruction of stature. *Am. J. Phys. Anthropol.* **136**, 147–155 (2008).
34. C. B. Ruff, *et al.*, Stature and body mass estimation from skeletal remains in the European Holocene. *Am. J. Phys. Anthropol.* **148**, 601–617 (2012).
35. K. Zhang, *et al.*, Estimation of stature from radiographically determined lower limb bone length in modern Chinese. *J. Forensic Leg. Med.* **79**, 101779 (2021).
36. E. Pomeroy, *et al.*, Stature estimation equations for South Asian skeletons based on DXA scans of contemporary adults. *Am. J. Phys. Anthropol.* **167** (2018).
37. C. B. Ruff, M. L. Burgess, N. Squires, J. A. Junno, E. Trinkaus, Lower limb articular scaling and body mass estimation in Pliocene and Pleistocene hominins. *J. Hum. Evol.* **115**, 85–111 (2018).
38. E. Pomeroy, *et al.*, Estimating body mass and composition from proximal femur dimensions using dual energy x-ray absorptiometry. *Archaeol. Anthropol. Sci.* **11** (2019).
